# Supplementary material for: Diagnosis of 25 genotypes of human papillomaviruses for their physical statuses in cervical precancerous/cancerous lesions: a comparison of E2/E6E7 ratio-based vs. multiple E1-L1/E6E7 ratio-based detection techniques
Source: Springer Nature journal article supplement (doi:10.1186/s12967-014-0282-2), 2014-10-01
Supplement: MOESM1 [file 9766416]

## Supplementary Tables

**Table S1. Primers and probes that were used in the DIPS, the E2/E6E7 ratio analysis and the multiple E1-L1/E6E7 ratio analysis for the 25 HPV genotypes.\***

| HPV Genotypes |          | E1    |       | E2    |       | E4E5  |       | L2    |       | L1    |       | E6E7  |       |
|---------------|----------|-------|-------|-------|-------|-------|-------|-------|-------|-------|-------|-------|-------|
|               |          | 5' at | 3' at | 5' at | 3' at | 5' at | 3' at | 5' at | 3' at | 5' at | 3' at | 5' at | 3' at |
| HPV 6         | Primer-F | 1504  | 1528  | 2752  | 2773  | 3278  | 3301  | 4947  | 4792  | 5841  | 5863  | 119   | 142   |
|               | Primer-R | 2470  | 2496  | 3665  | 3684  | 4427  | 4447  | 5849  | 5871  | 6675  | 6698  | 936   | 959   |
|               | Probe    | 1779  | 1803  | 2964  | 2990  | 3672  | 3693  | 5124  | 5151  | 6083  | 6108  | 160   | 183   |
| HPV 11        | Primer-F | 1503  | 1527  | 2751  | 2772  | 3277  | 3300  | 4937  | 4962  | 5822  | 5844  | 118   | 141   |
|               | Primer-R | 2469  | 2495  | 3661  | 3680  | 4420  | 4440  | 5830  | 5852  | 6659  | 6682  | 935   | 958   |
|               | Probe    | 1778  | 1802  | 2963  | 2989  | 3668  | 3689  | 5114  | 5141  | 6064  | 6089  | 159   | 182   |
| HPV 16        | Primer-F | 1532  | 1556  | 2783  | 2804  | 3309  | 3332  | 4768  | 4793  | 5692  | 5714  | 117   | 140   |
|               | Primer-R | 2498  | 2524  | 3696  | 3715  | 4239  | 4259  | 5700  | 5722  | 6535  | 6558  | 971   | 994   |
|               | Probe    | 1807  | 1831  | 2995  | 3021  | 3703  | 3724  | 4945  | 4972  | 5940  | 5965  | 158   | 181   |
| HPV 18        | Primer-F | 1603  | 1627  | 2857  | 2878  | 3386  | 3409  | 4773  | 4798  | 5667  | 5689  | 124   | 147   |
|               | Primer-R | 2569  | 2595  | 3761  | 3780  | 4247  | 4267  | 5675  | 5697  | 6510  | 6533  | 1017  | 1040  |
|               | Probe    | 1878  | 1902  | 3069  | 3095  | 3768  | 3689  | 4950  | 4977  | 5915  | 5940  | 165   | 188   |
| HPV 26        | Primer-F | 1516  | 1540  | 2764  | 2785  | 3290  | 3313  | 4718  | 4743  | 5642  | 5664  | 110   | 133   |
|               | Primer-R | 2482  | 2508  | 3710  | 3729  | 4192  | 4212  | 5650  | 5672  | 6485  | 6508  | 978   | 1001  |
|               | Probe    | 1791  | 1815  | 2976  | 3002  | 3717  | 3738  | 4898  | 4925  | 5887  | 5912  | 151   | 174   |
| HPV 31        | Primer-F | 1470  | 1494  | 2721  | 2742  | 3247  | 3270  | 4688  | 4713  | 5606  | 5628  | 121   | 144   |
|               | Primer-R | 2436  | 2462  | 3655  | 3674  | 4174  | 4194  | 5614  | 5636  | 6452  | 6475  | 965   | 988   |
|               | Probe    | 1745  | 1796  | 2933  | 2959  | 3662  | 3684  | 4865  | 4892  | 5857  | 5882  | 162   | 185   |
| HPV 33        | Primer-F | 1526  | 1550  | 2777  | 2798  | 3303  | 3326  | 4742  | 4767  | 5648  | 5670  | 122   | 145   |
|               | Primer-R | 2492  | 2518  | 3654  | 3673  | 4213  | 4233  | 5656  | 5678  | 6491  | 6514  | 982   | 1005  |
|               | Probe    | 1801  | 1825  | 2989  | 3015  | 3661  | 3683  | 4919  | 4946  | 5899  | 5924  | 163   | 186   |
| HPV 35        | Primer-F | 1491  | 1515  | 2724  | 2745  | 3250  | 3273  | 4713  | 4738  | 5628  | 5650  | 123   | 146   |
|               | Primer-R | 2440  | 2469  | 3640  | 3659  | 4187  | 4207  | 5636  | 5658  | 6474  | 6497  | 971   | 994   |
|               | Probe    | 1751  | 1775  | 2936  | 2962  | 3647  | 3669  | 4890  | 4917  | 5876  | 5901  | 164   | 187   |
| HPV 39        | Primer-F | 1614  | 1638  | 2868  | 2889  | 3397  | 3420  | 4806  | 4831  | 5724  | 5746  | 126   | 149   |
|               | Primer-R | 2580  | 2606  | 3781  | 3800  | 4280  | 4300  | 5732  | 5754  | 6564  | 6587  | 1031  | 1054  |
|               | Probe    | 1889  | 1913  | 3080  | 3106  | 3788  | 3810  | 4983  | 5010  | 5972  | 5997  | 167   | 190   |
| HPV 41        | Primer-F | 1523  | 1547  | 2765  | 2786  | 3296  | 3319  | 4598  | 4625  | 5600  | 5622  | 146   | 170   |
|               | Primer-R | 2483  | 2509  | 3726  | 3745  | 4118  | 4138  | 5608  | 5630  | 6476  | 6499  | 1075  | 1098  |
|               | Probe    | 1789  | 1813  | 2977  | 3003  | 3733  | 3755  | 4778  | 4805  | 5845  | 5870  | 192   | 215   |
| HPV 42        | Primer-F | 1479  | 1503  | 2730  | 2751  | 3259  | 3282  | 4964  | 4989  | 5891  | 5913  | 130   | 153   |
|               | Primer-R | 2445  | 2471  | 3724  | 3743  | 4426  | 4446  | 5899  | 5921  | 6734  | 6757  | 929   | 952   |
|               | Probe    | 1754  | 1778  | 2942  | 2968  | 3731  | 3753  | 5141  | 5168  | 6136  | 6161  | 171   | 194   |
| HPV 45        | Primer-F | 1561  | 1585  | 2815  | 2836  | 3344  | 3367  | 4765  | 4790  | 5662  | 5684  | 121   | 144   |
|               | Primer-R | 2527  | 2553  | 3725  | 3744  | 4239  | 4259  | 5670  | 5692  | 6514  | 6537  | 1017  | 1040  |
|               | Probe    | 1836  | 1860  | 3027  | 3053  | 3732  | 3753  | 4942  | 4969  | 5913  | 5938  | 162   | 185   |
| HPV 51        | Primer-F | 1500  | 1524  | 2748  | 2769  | 3271  | 3294  | 4666  | 4690  | 5575  | 5597  | 110   | 133   |
|               | Primer-R | 2466  | 2492  | 3649  | 3668  | 4137  | 4157  | 5583  | 5605  | 6418  | 6441  | 974   | 997   |
|               | Probe    | 1775  | 1799  | 2960  | 2986  | 3656  | 3677  | 4843  | 4870  | 5820  | 5845  | 151   | 174   |
| HPV 52        | Primer-F | 1520  | 1544  | 2771  | 2792  | 3297  | 3320  | 4822  | 4847  | 5725  | 5747  | 115   | 138   |
|               | Primer-R | 2486  | 2512  | 3690  | 3709  | 4293  | 4313  | 5733  | 5755  | 6583  | 6606  | 967   | 990   |
|               | Probe    | 1795  | 1819  | 2983  | 3009  | 3697  | 3721  | 4999  | 5026  | 5982  | 6007  | 156   | 179   |
| HPV 53        | Primer-F | 1519  | 1543  | 2769  | 2790  | 3295  | 3318  | 4812  | 4837  | 5709  | 5731  | 127   | 150   |
|               | Primer-R | 2484  | 2510  | 3730  | 3749  | 4286  | 4306  | 5717  | 5739  | 6546  | 6569  | 992   | 1015  |
|               | Probe    | 1793  | 1817  | 2981  | 3007  | 3737  | 3759  | 4989  | 5016  | 5951  | 5976  | 168   | 191   |
| HPV 56        | Primer-F | 1524  | 1548  | 2775  | 2796  | 3301  | 3324  | 4752  | 4777  | 5652  | 5674  | 124   | 147   |
|               | Primer-R | 2490  | 2516  | 3706  | 3725  | 4226  | 4246  | 5660  | 5682  | 6492  | 6515  | 998   | 1021  |
|               | Probe    | 1799  | 1823  | 2987  | 3013  | 3713  | 3735  | 4929  | 4956  | 5897  | 5922  | 165   | 188   |
| HPV 58        | Primer-F | 1530  | 1554  | 2781  | 2802  | 3307  | 3330  | 4776  | 4801  | 5697  | 5719  | 123   | 146   |
|               | Primer-R | 2496  | 2522  | 3673  | 3692  | 4247  | 4267  | 5705  | 5727  | 6540  | 6563  | 986   | 1009  |
|               | Probe    | 1805  | 1829  | 2993  | 3019  | 3680  | 3702  | 4953  | 4980  | 5948  | 5973  | 164   | 187   |
| HPV 59        | Primer-F | 1522  | 1546  | 2776  | 2797  | 3305  | 3328  | 4757  | 4782  | 5660  | 5682  | 74    | 97    |
|               | Primer-R | 2488  | 2514  | 3692  | 3711  | 4234  | 4254  | 5668  | 5690  | 6503  | 6526  | 975   | 998   |
|               | Probe    | 1797  | 1821  | 2988  | 3015  | 3699  | 3721  | 4934  | 4961  | 5908  | 5933  | 115   | 138   |
| HPV 61        | Primer-F | 1476  | 1500  | 2739  | 2760  | 3271  | 3294  | 4930  | 4955  | 5818  | 5840  | 109   | 132   |

|               |          |      |      |      |      |      |      |      |      |      |      |     |      |
|---------------|----------|------|------|------|------|------|------|------|------|------|------|-----|------|
|               | Primer-R | 2442 | 2468 | 3691 | 3710 | 4398 | 4418 | 5826 | 5848 | 6664 | 6687 | 929 | 952  |
|               | Probe    | 1751 | 1775 | 2951 | 2977 | 3698 | 3720 | 5104 | 5131 | 6072 | 6097 | 147 | 170  |
| <b>HPV 62</b> | Primer-F | 1384 | 1408 | 2647 | 2668 | 3176 | 3199 | 4901 | 4926 | 5831 | 5853 | 14  | 37   |
|               | Probe    | 2350 | 2376 | 3596 | 3615 | 4363 | 4383 | 5839 | 5861 | 6677 | 6700 | 837 | 860  |
| <b>HPV 66</b> | Primer-F | 1506 | 1630 | 2757 | 2778 | 3283 | 3306 | 4801 | 4826 | 5701 | 5723 | 124 | 147  |
|               | Primer-R | 2472 | 2498 | 3682 | 3701 | 4275 | 4295 | 5709 | 5731 | 6541 | 6564 | 998 | 1021 |
|               | Probe    | 1781 | 1805 | 2969 | 2995 | 3689 | 3711 | 4978 | 5005 | 5946 | 5971 | 165 | 188  |
| <b>HPV 68</b> | Primer-F | 1462 | 1486 | 2716 | 2737 | 3245 | 3268 | 4654 | 4679 | 5569 | 5591 | 20  | 43   |
|               | Primer-R | 2428 | 2454 | 3629 | 3648 | 4128 | 4148 | 5577 | 5599 | 6412 | 6435 | 927 | 950  |
|               | Probe    | 1737 | 1861 | 2928 | 2954 | 3636 | 3658 | 4831 | 4858 | 5817 | 5842 | 61  | 84   |
| <b>HPV 69</b> | Primer-F | 1512 | 1536 | 2760 | 2781 | 3286 | 3309 | 4686 | 4711 | 5595 | 5616 | 115 | 138  |
|               | Primer-R | 2478 | 2504 | 3691 | 3710 | 4160 | 4180 | 5603 | 5625 | 6441 | 6464 | 986 | 1009 |
|               | Probe    | 1787 | 1811 | 2972 | 2998 | 3698 | 3719 | 4866 | 4893 | 5837 | 5862 | 156 | 179  |
| <b>HPV 74</b> | Primer-F | 1365 | 1389 | 2613 | 2634 | 3139 | 3162 | 4739 | 4764 | 5642 | 5664 | 17  | 40   |
|               | Primer-R | 2331 | 2357 | 3565 | 3584 | 4213 | 4233 | 5650 | 5672 | 6476 | 6499 | 818 | 841  |
|               | Probe    | 1640 | 1664 | 2825 | 2851 | 3572 | 3593 | 4916 | 4943 | 5884 | 5909 | 58  | 81   |
| <b>HPV 93</b> | Primer-F | 1370 | 1394 | 2612 | 2633 | 3141 | 3164 | 4676 | 4703 | 5697 | 5719 | 136 | 159  |
|               | Primer-R | 2327 | 2353 | 3601 | 3620 | 4074 | 4094 | 5705 | 5727 | 6579 | 6602 | 916 | 939  |
|               | Probe    | 1633 | 1657 | 2824 | 2850 | 3608 | 3630 | 4888 | 4915 | 5945 | 5970 | 177 | 200  |

\* Primer-F, the forward primer of a primer pair. Primer-R, the reverse primer of a primer pair. Probe, the TaqMan probe that was used in combination with the primer pair in a real-time PCR system. The 5' and 3' positions of each primer and probe were given based on the GenBank accession numbers AF092932 for HPV 6, FR872717 for HPV 11, NC\_001526 for HPV 16, AY262282 for HPV 18, NC\_001583 for HPV 26, J04353 for HPV 31, M12732 for HPV 33, M74117 for HPV 35, KC470244 for HPV 39, NC\_001354 for HPV 41, GQ472847 for HPV 42, KC470251 for HPV 45, M62877 for HPV 51, GQ472848 for HPV 52, NC\_001593 for HPV 53, EF177181 for HPV 56, FJ385261 for HPV 58, X77858 for HPV 59, U31793 for HPV 61, AY395706 for HPV 62, U31794 for HPV 66, GQ472851 for HPV 68, AB027020 for HPV 69, AF436130 for HPV 74 and AY382778 for HPV 93. For DIPS, each member of the primer pairs and its reversely complementary form were separately used for the 24 independent amplification reactions. For the E2/E6E7 ratio analysis, only the primer pairs and probes corresponding to the E2 and E6E7 gene regions were used. For the E1-L1/E6E7 ratio analysis, the E1-, E2-, E4E5-, L1-, L2- and E6E7-primer pairs and probes were used. Additionally, the primers and probe used for determining the copy number of ACTB gene are as follows: ACTB-F, 5'-agcctcgctttgccga-3', ACTB-R, 5'-ctggcgctggggcg-3' and ACTB-P, 5'-FAM-cgcgcccgctccacaccgccc-TAMRA-3'. For DIPS, the adaptor-specific primer (ASP) used in the exponential amplification stage is 5'-ggcatcagctcagctcgtag-3'.

**Table S2. Comparison of the diagnostic performances of DIPS, E2/E6E7 ratio analysis and multiple E1-L1/E6E7 ratio analysis in the 25 genotypes of HPVs.\***

| HPV genotypes  | DIPS       |                  | E2/E6E7 ratio analysis |            |            | E1-L1/E6E7 ratio analysis |           |            | κvalue <sup>a§</sup> | κvalue <sup>b§</sup> | κvalue <sup>c§</sup> |
|----------------|------------|------------------|------------------------|------------|------------|---------------------------|-----------|------------|----------------------|----------------------|----------------------|
|                | Episomal   | Mixed/Integrated | Episomal               | Mixed      | Integrated | Episomal                  | Mixed     | Integrated |                      |                      |                      |
| HPV 6 (n=27)   | 25 (92.6)  | 2 (7.4)          | 26 (96.3)              | 1 (3.7)    | 0 (0)      | 26 (96.3)                 | 1 (3.7)   | 0 (0)      | 0.649                | 0.649                | 1.000                |
| HPV 11 (n=9)   | 9 (100)    | 0 (0)            | 9 (100)                | 0 (0)      | 0 (0)      | 9 (100)                   | 0 (0)     | 0 (0)      | N.A. <sup>†</sup>    | N.A.                 | N.A.                 |
| HPV 16 (n=602) | 436 (72.4) | 166 (27.6)       | 480 (79.7)             | 112 (18.6) | 10 (1.7)   | 448 (74.4)                | 99 (16.5) | 55 (9.1)   | 0.792                | 0.932                | 0.618                |
| HPV 18 (n=126) | 73 (57.9)  | 53 (42.1)        | 87 (69.0)              | 21 (16.7)  | 18 (14.3)  | 71 (56.3)                 | 20 (15.9) | 35 (27.8)  | 0.730                | 0.968                | 0.374                |
| HPV 26 (n=2)   | 1 (50.0)   | 1 (50.0)         | 1 (50.0)               | 1 (50.0)   | 0 (0)      | 1 (50.0)                  | 1 (50.0)  | 0 (0)      | 1.000                | 1.000                | 1.000                |
| HPV 31 (n=79)  | 44 (55.7)  | 35 (44.3)        | 51 (64.6)              | 16 (18.9)  | 12 (16.5)  | 50 (63.3)                 | 8 (10.1)  | 21 (26.6)  | 0.817                | 0.843                | 0.785                |
| HPV 33 (n=89)  | 53 (59.6)  | 36 (40.4)        | 57 (64.0)              | 25 (28.1)  | 7 (7.9)    | 52 (58.4)                 | 8 (9.0)   | 29 (32.6)  | 0.858                | 0.977                | 0.570                |
| HPV 35 (n=29)  | 19 (65.5)  | 10 (34.5)        | 20 (69.0)              | 5 (17.2)   | 4 (13.8)   | 17 (58.6)                 | 5 (17.2)  | 7 (24.2)   | 0.609                | 0.854                | 0.806                |
| HPV 39 (n=35)  | 21 (60.0)  | 14 (40.0)        | 24 (68.6)              | 8 (22.9)   | 3 (8.5)    | 21 (60.0)                 | 8 (22.9)  | 6 (17.1)   | 0.815                | 1.000                | 0.836                |
| HPV 41 (n=3)   | 3 (100)    | 0 (0)            | 3 (100)                | 0 (0)      | 0 (0)      | 3 (100)                   | 0 (0)     | 0 (0)      | N.A.                 | N.A.                 | N.A.                 |
| HPV 42 (n=5)   | 4 (80.0)   | 1 (20.0)         | 5 (100)                | 0 (0)      | 0 (0)      | 5 (100)                   | 0 (0)     | 0 (0)      | N.A.                 | N.A.                 | N.A.                 |
| HPV 45 (n=8)   | 4 (50.0)   | 4 (50.0)         | 4 (50.0)               | 4 (50.0)   | 0 (0)      | 4 (50.0)                  | 4 (50.0)  | 0 (0)      | 1.000                | 1.000                | 1.000                |
| HPV 51 (n=8)   | 5 (62.5)   | 3 (37.5)         | 5 (62.5)               | 2 (25.0)   | 1 (12.5)   | 5 (62.5)                  | 2 (25.0)  | 1 (12.5)   | 1.000                | 1.000                | 1.000                |
| HPV 52 (n=13)  | 8 (61.5)   | 5 (8.5)          | 10 (76.9)              | 2 (15.4)   | 1 (7.7)    | 10 (76.9)                 | 1 (7.7)   | 2 (15.4)   | 0.649                | 0.649                | 0.800                |
| HPV 53 (n=26)  | 20 (76.9)  | 6 (23.1)         | 22 (84.6)              | 2 (7.7)    | 2 (7.7)    | 22 (84.6)                 | 1 (3.8)   | 3 (11.5)   | 0.755                | 0.755                | 0.859                |
| HPV 56 (n=21)  | 16 (76.2)  | 5 (23.8)         | 16 (76.2)              | 3 (14.3)   | 2 (9.5)    | 16 (76.2)                 | 3 (14.3)  | 2 (9.5)    | 1.000                | 1.000                | 1.000                |
| HPV 58 (n=19)  | 16 (84.2)  | 3 (15.8)         | 17 (89.5)              | 1 (5.3)    | 1 (5.3)    | 16 (84.2)                 | 2 (10.5)  | 1 (5.3)    | 0.771                | 1.000                | 0.779                |
| HPV 59 (n=7)   | 6 (85.7)   | 1 (14.3)         | 6 (85.7)               | 1 (14.3)   | 0 (0)      | 6 (85.7)                  | 1 (14.3)  | 0 (0)      | 1.000                | 1.000                | 1.000                |
| HPV 61 (n=5)   | 4 (80.0)   | 1 (20.0)         | 4 (80.0)               | 1 (20.0)   | 0 (0)      | 4 (80.0)                  | 1 (20.0)  | 0 (0)      | 1.000                | 1.000                | 1.000                |
| HPV 62 (n=6)   | 5 (83.3)   | 1 (16.7)         | 5 (83.3)               | 1 (16.7)   | 0 (0)      | 4 (66.7)                  | 1 (16.7)  | 1 (16.7)   | -0.200               | 0.571                | 1.000                |
| HPV 66 (n=16)  | 12 (75.0)  | 4 (25.0)         | 12 (75.0)              | 3 (18.8)   | 1 (6.3)    | 12 (75)                   | 3 (18.8)  | 1 (6.3)    | 1.000                | 1.000                | N.A.                 |
| HPV 68 (n=18)  | 14 (77.8)  | 4 (22.2)         | 15 (83.5)              | 2 (11.1)   | 1 (5.6)    | 14 (77.8)                 | 1 (5.5)   | 3 (16.7)   | 0.824                | 1.000                | 0.670                |
| HPV 69 (n=7)   | 5 (71.4)   | 2 (28.6)         | 5 (71.4)               | 1 (14.3)   | 1 (14.3)   | 5 (71.4)                  | 0 (0)     | 2 (28.6)   | 1.000                | 1.000                | N.A.                 |
| HPV 74 (n=1)   | 1 (100)    | 0 (0)            | 1 (100)                | 0 (0)      | 0 (0)      | 1 (100)                   | 0 (0)     | 0 (0)      | N.A.                 | N.A.                 | N.A.                 |
| HPV 93 (n=1)   | 1 (100)    | 0 (0)            | 1 (100)                | 0 (0)      | 0 (0)      | 1 (100)                   | 0 (0)     | 0 (0)      | N.A.                 | N.A.                 | N.A.                 |

\* Data are presented as number (%).

a The detection consistency was compared between DIPS and E2/E6E7 ratio analysis using Cohen's κ value. We defined the κ value of 0–0.20 as slight, 0.21–0.40 as fair, 0.41–0.60 as moderate, 0.61–0.80 as substantial, and 0.81–1 as perfect consistency between two series of detection data. To accommodate the DIPS system, which only provides information on whether or not the integration event has happened, we merged the mixed and integrated infection statuses detected by E2/E6E7 ratio analysis into one category, that is, the mixed/integrated infection status, to perform the κ value calculation.

b The detection consistency was compared between DIPS and E1-L1/E6E7 ratio analysis using Cohen's κ value. The mixed HPV infection and integrated HPV infection detected by E2/E6E7 ratio analysis were merged into a mixed/integrated infection status to perform the κ value calculation.

c The detection consistency was compared between E2/E6E7 ratio analysis and E1-L1/E6E7 ratio analysis.

§ The detailed data used for calculating the  $\kappa$  value are listed in Table S6-S30.

†N.A., not available. The  $\kappa$  value could not be calculated because one or both of the compared data series were constants.

**Table S3. Detection consistency between DIPS and E2/E6E7 ratio analysis in the enrolled 1162 women.\***

| Items          |                  | E2/E6E7 ratio analysis |                  |
|----------------|------------------|------------------------|------------------|
|                |                  | Episomal               | Mixed/Integrated |
| DIPS           | Episomal         | 799                    | 6                |
|                | Mixed/Integrated | 87                     | 270              |
| <b>κ value</b> |                  | 0.799                  |                  |

\* The detection consistency was compared between DIPS and E2/E6E7 ratio analysis using Cohen's  $\kappa$  value. We defined the  $\kappa$  value of 0–0.20 as slight, 0.21–0.40 as fair, 0.41–0.60 as moderate, 0.61–0.80 as substantial, and 0.81–1 as perfect consistency between two series of detection data.

**Table S4. Detection consistency between DIPS and multiple E1-L1/E6E7 ratio analysis in the enrolled 1162 women.\***

| Items          |                  | E1-L1/E6E7 ratio analysis |                  |
|----------------|------------------|---------------------------|------------------|
|                |                  | Episomal                  | Mixed/Integrated |
| DIPS           | Episomal         | 797                       | 8                |
|                | Mixed/Integrated | 26                        | 331              |
| <b>κ value</b> |                  | 0.930                     |                  |

\* The detection consistency was compared between DIPS and E1-L1/E6E7 ratio analysis using Cohen's  $\kappa$  value. We defined the  $\kappa$  value of 0–0.20 as slight, 0.21–0.40 as fair, 0.41–0.60 as moderate, 0.61–0.80 as substantial, and 0.81–1 as perfect consistency between two series of detection data.

**Table S5. Detection consistency between E2/E6E7 ratio analysis and multiple E1-L1/E6E7 ratio analysis in the enrolled 1162 women.\***

| Items                  |            | E1-L1/E6E7 ratio analysis |       |            |
|------------------------|------------|---------------------------|-------|------------|
|                        |            | Episomal                  | Mixed | Integrated |
| E2/E6E7 ratio analysis | Episomal   | 823                       | 1     | 62         |
|                        | Mixed      | 0                         | 112   | 100        |
|                        | Integrated | 0                         | 13    | 51         |
| <b>κ value</b>         |            | 0.648**                   |       |            |

\* The detection consistency was compared between E2/E6E7 ratio analysis and E1-L1/E6E7 ratio analysis using Cohen's  $\kappa$  value. We defined the  $\kappa$  value of 0–0.20 as slight, 0.21–0.40 as fair, 0.41–0.60 as moderate, 0.61–0.80 as substantial, and 0.81–1 as perfect consistency between two series of detection data.

\*\* If the mixed HPV infection and integrated HPV infection are taken as a whole, the  $\kappa$  value is 0.861 between E2/E6E7 ratio analysis and E1-L1/E6E7 ratio analysis.

**Table S6. Detection results of DIPS, E2/E6E7 ratio analysis and multiple E1-L1/E6E7 ratio analysis in the HPV 6-positive cases.**

| Patient No. | DIPS             | E2/E6E7 ratio analysis | E1-L1/E6E7 ratio analysis |
|-------------|------------------|------------------------|---------------------------|
| 102370      | Negative         | Negative               | Negative                  |
| 119395      | Negative         | Negative               | Negative                  |
| 130000      | Negative         | Negative               | Negative                  |
| 135157      | Mixed/Integrated | Negative               | Negative                  |
| 137892      | Negative         | Negative               | Negative                  |
| 138025      | Negative         | Negative               | Negative                  |
| 143837      | Negative         | Negative               | Negative                  |
| 145414      | Negative         | Negative               | Negative                  |

|        |                  |          |          |
|--------|------------------|----------|----------|
| 147441 | Negative         | Negative | Negative |
| 147728 | Negative         | Negative | Negative |
| 149377 | Negative         | Negative | Negative |
| 150484 | Negative         | Negative | Negative |
| 151119 | Negative         | Negative | Negative |
| 151225 | Negative         | Negative | Negative |
| 152179 | Negative         | Negative | Negative |
| 197769 | Negative         | Negative | Negative |
| 198132 | Negative         | Negative | Negative |
| 497444 | Negative         | Negative | Negative |
| 513110 | Negative         | Negative | Negative |
| 518332 | Negative         | Negative | Negative |
| 594031 | Negative         | Negative | Negative |
| 611980 | Negative         | Negative | Negative |
| 629931 | Negative         | Negative | Negative |
| 636457 | Negative         | Negative | Negative |
| 638090 | Negative         | Negative | Negative |
| 640794 | Mixed/Integrated | Mixed    | Mixed    |
| 648697 | Negative         | Negative | Negative |

**Table S7. Detection results of DIPS, E2/E6E7 ratio analysis and multiple E1-L1/E6E7 ratio analysis in the HPV 11-positive cases.**

| <b>Patient No.</b> | <b>DIPS</b> | <b>E2/E6E7 ratio analysis</b> | <b>E1-L1/E6E7 ratio analysis</b> |
|--------------------|-------------|-------------------------------|----------------------------------|
| 138943             | Negative    | Negative                      | Negative                         |
| 141907             | Negative    | Negative                      | Negative                         |
| 144079             | Negative    | Negative                      | Negative                         |
| 151778             | Negative    | Negative                      | Negative                         |
| 153016             | Negative    | Negative                      | Negative                         |
| 180930             | Negative    | Negative                      | Negative                         |
| 211061             | Negative    | Negative                      | Negative                         |
| 138943             | Negative    | Negative                      | Negative                         |
| 141907             | Negative    | Negative                      | Negative                         |

**Table S8. Detection results of DIPS, E2/E6E7 ratio analysis and multiple E1-L1/E6E7 ratio analysis in the HPV 16-positive cases.**

| <b>Patient No.</b> | <b>DIPS</b>      | <b>E2/E6E7 ratio analysis</b> | <b>E1-L1/E6E7 ratio analysis</b> |
|--------------------|------------------|-------------------------------|----------------------------------|
| 126959             | Negative         | Negative                      | Negative                         |
| 138671             | Negative         | Negative                      | Negative                         |
| 100236             | Negative         | Negative                      | Negative                         |
| 100369             | Negative         | Negative                      | Negative                         |
| 100556             | Negative         | Negative                      | Negative                         |
| 100877             | Negative         | Negative                      | Negative                         |
| 101080             | Negative         | Negative                      | Negative                         |
| 101269             | Mixed/Integrated | Mixed                         | Integrated                       |
| 101484             | Mixed/Integrated | Mixed                         | Integrated                       |
| 102147             | Negative         | Negative                      | Negative                         |

|        |                  |          |            |
|--------|------------------|----------|------------|
| 103748 | Negative         | Negative | Negative   |
| 104732 | Mixed/Integrated | Mixed    | Integrated |
| 105349 | Negative         | Negative | Negative   |
| 106584 | Negative         | Negative | Negative   |
| 106585 | Negative         | Negative | Negative   |
| 107305 | Negative         | Negative | Negative   |
| 107483 | Negative         | Negative | Negative   |
| 107497 | Negative         | Negative | Negative   |
| 107598 | Negative         | Negative | Negative   |
| 107599 | Negative         | Negative | Negative   |
| 107600 | Negative         | Negative | Negative   |
| 108240 | Negative         | Negative | Negative   |
| 108907 | Negative         | Negative | Negative   |
| 109518 | Negative         | Negative | Negative   |
| 109520 | Negative         | Negative | Negative   |
| 109762 | Negative         | Negative | Negative   |
| 109854 | Negative         | Negative | Negative   |
| 110907 | Mixed/Integrated | Negative | Integrated |
| 111041 | Negative         | Negative | Negative   |
| 111156 | Negative         | Negative | Negative   |
| 111396 | Negative         | Negative | Negative   |
| 111400 | Mixed/Integrated | Mixed    | Integrated |
| 111930 | Negative         | Negative | Negative   |
| 112464 | Negative         | Negative | Negative   |
| 113353 | Negative         | Negative | Negative   |
| 114954 | Negative         | Negative | Negative   |
| 115145 | Mixed/Integrated | Mixed    | Integrated |
| 115284 | Negative         | Negative | Negative   |
| 115732 | Negative         | Negative | Negative   |
| 115843 | Negative         | Negative | Negative   |
| 115885 | Negative         | Negative | Negative   |
| 116199 | Negative         | Negative | Negative   |
| 116785 | Negative         | Negative | Negative   |
| 116786 | Negative         | Negative | Negative   |
| 117087 | Negative         | Negative | Negative   |
| 117800 | Negative         | Negative | Negative   |
| 118067 | Mixed/Integrated | Mixed    | Integrated |
| 118240 | Negative         | Negative | Negative   |
| 118286 | Negative         | Negative | Negative   |
| 118335 | Negative         | Negative | Negative   |
| 118689 | Negative         | Negative | Negative   |
| 118887 | Negative         | Negative | Negative   |
| 119045 | Negative         | Negative | Negative   |
| 119936 | Negative         | Negative | Negative   |
| 120303 | Negative         | Negative | Negative   |
| 120824 | Mixed/Integrated | Mixed    | Integrated |
| 121011 | Negative         | Negative | Negative   |
| 121076 | Negative         | Negative | Negative   |
| 121077 | Negative         | Negative | Negative   |

|        |                  |          |            |
|--------|------------------|----------|------------|
| 121265 | Negative         | Negative | Negative   |
| 121272 | Negative         | Negative | Negative   |
| 121299 | Mixed/Integrated | Mixed    | Integrated |
| 121532 | Negative         | Negative | Negative   |
| 121664 | Negative         | Negative | Negative   |
| 122603 | Negative         | Negative | Negative   |
| 122604 | Negative         | Negative | Negative   |
| 122834 | Negative         | Negative | Negative   |
| 123020 | Negative         | Negative | Negative   |
| 123297 | Negative         | Negative | Negative   |
| 123314 | Negative         | Negative | Negative   |
| 123590 | Negative         | Negative | Negative   |
| 123649 | Negative         | Negative | Negative   |
| 123650 | Negative         | Negative | Negative   |
| 123650 | Negative         | Negative | Negative   |
| 123687 | Negative         | Negative | Negative   |
| 123689 | Negative         | Negative | Negative   |
| 123811 | Mixed/Integrated | Mixed    | Integrated |
| 124866 | Mixed/Integrated | Mixed    | Integrated |
| 124878 | Mixed/Integrated | Mixed    | Integrated |
| 125315 | Negative         | Negative | Negative   |
| 125322 | Negative         | Negative | Negative   |
| 125583 | Negative         | Negative | Negative   |
| 126450 | Negative         | Negative | Negative   |
| 126851 | Negative         | Negative | Negative   |
| 126938 | Negative         | Negative | Negative   |
| 126986 | Negative         | Negative | Negative   |
| 127201 | Negative         | Negative | Negative   |
| 127274 | Negative         | Negative | Negative   |
| 127454 | Mixed/Integrated | Mixed    | Integrated |
| 128141 | Negative         | Negative | Negative   |
| 128710 | Negative         | Negative | Negative   |
| 128711 | Negative         | Negative | Negative   |
| 128845 | Negative         | Negative | Negative   |
| 128848 | Negative         | Negative | Negative   |
| 129205 | Negative         | Negative | Negative   |
| 129207 | Negative         | Negative | Negative   |
| 129208 | Negative         | Negative | Negative   |
| 129213 | Negative         | Negative | Negative   |
| 129440 | Negative         | Negative | Negative   |
| 129534 | Negative         | Negative | Negative   |
| 129813 | Negative         | Negative | Negative   |
| 130217 | Negative         | Negative | Negative   |
| 130529 | Negative         | Negative | Negative   |
| 130540 | Negative         | Negative | Negative   |
| 130630 | Negative         | Negative | Negative   |
| 130899 | Negative         | Negative | Negative   |
| 131362 | Negative         | Negative | Negative   |
| 131387 | Negative         | Negative | Negative   |



|        |                  |          |            |
|--------|------------------|----------|------------|
| 131413 | Negative         | Negative | Negative   |
| 131417 | Negative         | Negative | Negative   |
| 131493 | Negative         | Negative | Negative   |
| 131592 | Negative         | Negative | Negative   |
| 131594 | Mixed/Integrated | Mixed    | Mixed      |
| 131829 | Negative         | Negative | Negative   |
| 131885 | Negative         | Negative | Negative   |
| 132069 | Negative         | Negative | Negative   |
| 132477 | Negative         | Negative | Negative   |
| 132506 | Mixed/Integrated | Mixed    | Mixed      |
| 133135 | Mixed/Integrated | Mixed    | Mixed      |
| 133159 | Negative         | Negative | Negative   |
| 133189 | Negative         | Negative | Negative   |
| 133198 | Negative         | Negative | Negative   |
| 133290 | Negative         | Negative | Negative   |
| 133625 | Negative         | Negative | Negative   |
| 133626 | Mixed/Integrated | Mixed    | Integrated |
| 133646 | Negative         | Negative | Negative   |
| 133683 | Negative         | Negative | Negative   |
| 133818 | Negative         | Negative | Negative   |
| 133922 | Negative         | Negative | Negative   |
| 134250 | Negative         | Negative | Negative   |
| 134315 | Negative         | Negative | Negative   |
| 134355 | Negative         | Negative | Negative   |
| 134358 | Negative         | Negative | Negative   |
| 134494 | Negative         | Negative | Negative   |
| 134507 | Negative         | Negative | Negative   |
| 134615 | Negative         | Negative | Negative   |
| 134908 | Negative         | Negative | Negative   |
| 134915 | Negative         | Negative | Negative   |
| 134923 | Negative         | Negative | Negative   |
| 134928 | Negative         | Negative | Negative   |
| 135020 | Mixed/Integrated | Mixed    | Mixed      |
| 135059 | Negative         | Negative | Negative   |
| 135275 | Negative         | Negative | Negative   |
| 135280 | Negative         | Negative | Negative   |
| 135838 | Negative         | Negative | Negative   |
| 135895 | Negative         | Negative | Negative   |
| 135898 | Negative         | Negative | Negative   |
| 136158 | Negative         | Negative | Negative   |
| 136188 | Negative         | Negative | Negative   |
| 136255 | Negative         | Negative | Negative   |
| 136711 | Negative         | Negative | Negative   |
| 136781 | Negative         | Negative | Negative   |
| 137073 | Negative         | Negative | Negative   |
| 137079 | Mixed/Integrated | Mixed    | Mixed      |
| 137318 | Negative         | Negative | Negative   |
| 137422 | Mixed/Integrated | Mixed    | Integrated |
| 137481 | Negative         | Negative | Negative   |

|        |                  |          |            |
|--------|------------------|----------|------------|
| 137584 | Negative         | Negative | Negative   |
| 137984 | Negative         | Negative | Negative   |
| 138159 | Negative         | Negative | Negative   |
| 138402 | Negative         | Negative | Negative   |
| 138468 | Negative         | Negative | Negative   |
| 138485 | Negative         | Negative | Negative   |
| 138496 | Negative         | Negative | Negative   |
| 138686 | Negative         | Negative | Negative   |
| 138725 | Negative         | Negative | Negative   |
| 138783 | Negative         | Negative | Negative   |
| 139289 | Negative         | Negative | Negative   |
| 139291 | Negative         | Negative | Negative   |
| 139584 | Negative         | Negative | Negative   |
| 139621 | Negative         | Negative | Negative   |
| 139684 | Negative         | Negative | Negative   |
| 139784 | Negative         | Negative | Negative   |
| 139973 | Mixed/Integrated | Mixed    | Mixed      |
| 140076 | Mixed/Integrated | Mixed    | Integrated |
| 140163 | Mixed/Integrated | Negative | Integrated |
| 140203 | Negative         | Negative | Negative   |
| 140276 | Negative         | Negative | Negative   |
| 140278 | Mixed/Integrated | Mixed    | Mixed      |
| 140284 | Negative         | Negative | Negative   |
| 140644 | Negative         | Negative | Negative   |
| 140846 | Negative         | Negative | Negative   |
| 140855 | Mixed/Integrated | Mixed    | Integrated |
| 141122 | Mixed/Integrated | Mixed    | Integrated |
| 141189 | Negative         | Negative | Negative   |
| 141455 | Mixed/Integrated | Mixed    | Integrated |
| 141531 | Negative         | Negative | Negative   |
| 141536 | Mixed/Integrated | Mixed    | Mixed      |
| 141654 | Negative         | Negative | Negative   |
| 141666 | Negative         | Negative | Negative   |
| 141676 | Mixed/Integrated | Mixed    | Mixed      |
| 141684 | Negative         | Negative | Negative   |
| 141695 | Mixed/Integrated | Mixed    | Integrated |
| 142110 | Mixed/Integrated | Mixed    | Mixed      |
| 142185 | Negative         | Negative | Negative   |
| 142187 | Mixed/Integrated | Negative | Negative   |
| 142189 | Negative         | Negative | Negative   |
| 142190 | Mixed/Integrated | Mixed    | Integrated |
| 142219 | Negative         | Negative | Negative   |
| 142387 | Negative         | Negative | Negative   |
| 143020 | Mixed/Integrated | Negative | Integrated |
| 143326 | Mixed/Integrated | Mixed    | Mixed      |
| 143435 | Negative         | Negative | Negative   |
| 143436 | Negative         | Negative | Negative   |
| 143439 | Negative         | Negative | Negative   |
| 143439 | Negative         | Negative | Negative   |

|        |                  |            |            |
|--------|------------------|------------|------------|
| 143440 | Negative         | Negative   | Negative   |
| 143441 | Negative         | Negative   | Negative   |
| 143444 | Mixed/Integrated | Mixed      | Integrated |
| 143573 | Negative         | Negative   | Negative   |
| 143936 | Mixed/Integrated | Mixed      | Mixed      |
| 144292 | Negative         | Negative   | Negative   |
| 144594 | Negative         | Negative   | Negative   |
| 144594 | Negative         | Negative   | Negative   |
| 144691 | Mixed/Integrated | Integrated | Integrated |
| 145305 | Negative         | Negative   | Negative   |
| 145545 | Negative         | Negative   | Negative   |
| 145762 | Negative         | Negative   | Negative   |
| 145789 | Mixed/Integrated | Mixed      | Integrated |
| 145919 | Negative         | Negative   | Negative   |
| 146359 | Negative         | Negative   | Negative   |
| 146374 | Mixed/Integrated | Mixed      | Mixed      |
| 146453 | Negative         | Negative   | Negative   |
| 146526 | Negative         | Negative   | Negative   |
| 146551 | Mixed/Integrated | Mixed      | Mixed      |
| 146551 | Mixed/Integrated | Mixed      | Mixed      |
| 146586 | Negative         | Negative   | Negative   |
| 146982 | Negative         | Negative   | Negative   |
| 147094 | Negative         | Negative   | Negative   |
| 147097 | Negative         | Negative   | Negative   |
| 147097 | Mixed/Integrated | Mixed      | Integrated |
| 147204 | Negative         | Negative   | Negative   |
| 147524 | Mixed/Integrated | Mixed      | Integrated |
| 147575 | Negative         | Negative   | Negative   |
| 147592 | Negative         | Negative   | Negative   |
| 147686 | Mixed/Integrated | Negative   | Integrated |
| 148048 | Negative         | Negative   | Negative   |
| 148055 | Negative         | Negative   | Negative   |
| 148242 | Negative         | Negative   | Negative   |
| 148802 | Negative         | Negative   | Negative   |
| 149015 | Negative         | Negative   | Negative   |
| 149049 | Negative         | Negative   | Negative   |
| 149259 | Negative         | Negative   | Negative   |
| 150147 | Negative         | Negative   | Negative   |
| 150720 | Mixed/Integrated | Mixed      | Mixed      |
| 150790 | Negative         | Negative   | Negative   |
| 151023 | Negative         | Negative   | Negative   |
| 151111 | Negative         | Negative   | Negative   |
| 151247 | Negative         | Negative   | Negative   |
| 151251 | Mixed/Integrated | Mixed      | Mixed      |
| 151255 | Mixed/Integrated | Mixed      | Integrated |
| 151411 | Negative         | Negative   | Negative   |
| 151504 | Mixed/Integrated | Mixed      | Integrated |
| 151511 | Negative         | Negative   | Negative   |
| 151645 | Mixed/Integrated | Mixed      | Mixed      |

|        |                  |            |            |
|--------|------------------|------------|------------|
| 151687 | Mixed/Integrated | Negative   | Integrated |
| 151984 | Negative         | Negative   | Negative   |
| 152052 | Negative         | Negative   | Negative   |
| 152075 | Negative         | Negative   | Negative   |
| 152078 | Mixed/Integrated | Mixed      | Integrated |
| 152146 | Negative         | Negative   | Negative   |
| 152421 | Negative         | Negative   | Negative   |
| 152496 | Negative         | Negative   | Negative   |
| 152610 | Negative         | Negative   | Negative   |
| 152621 | Negative         | Negative   | Negative   |
| 152624 | Mixed/Integrated | Mixed      | Mixed      |
| 152856 | Mixed/Integrated | Mixed      | Integrated |
| 152857 | Negative         | Negative   | Negative   |
| 152858 | Mixed/Integrated | Mixed      | Integrated |
| 152931 | Negative         | Negative   | Negative   |
| 153170 | Negative         | Negative   | Negative   |
| 153278 | Mixed/Integrated | Mixed      | Mixed      |
| 153294 | Negative         | Negative   | Negative   |
| 153339 | Mixed/Integrated | Mixed      | Integrated |
| 153688 | Mixed/Integrated | Integrated | Integrated |
| 153692 | Mixed/Integrated | Integrated | Integrated |
| 153782 | Negative         | Negative   | Negative   |
| 153816 | Negative         | Negative   | Negative   |
| 153818 | Negative         | Negative   | Negative   |
| 154009 | Negative         | Negative   | Negative   |
| 154100 | Mixed/Integrated | Negative   | Integrated |
| 154217 | Negative         | Negative   | Negative   |
| 154466 | Negative         | Negative   | Negative   |
| 154744 | Negative         | Negative   | Negative   |
| 155194 | Negative         | Negative   | Negative   |
| 155363 | Mixed/Integrated | Negative   | Integrated |
| 155382 | Negative         | Negative   | Negative   |
| 155523 | Mixed/Integrated | Mixed      | Integrated |
| 155678 | Negative         | Negative   | Negative   |
| 155689 | Mixed/Integrated | Integrated | Integrated |
| 155822 | Mixed/Integrated | Mixed      | Integrated |
| 156049 | Negative         | Negative   | Negative   |
| 156144 | Negative         | Negative   | Negative   |
| 156231 | Negative         | Negative   | Negative   |
| 156251 | Negative         | Negative   | Negative   |
| 156274 | Negative         | Negative   | Negative   |
| 156282 | Mixed/Integrated | Mixed      | Mixed      |
| 156526 | Negative         | Negative   | Negative   |
| 156544 | Mixed/Integrated | Mixed      | Mixed      |
| 156827 | Negative         | Negative   | Negative   |
| 156829 | Mixed/Integrated | Mixed      | Mixed      |
| 156859 | Negative         | Negative   | Negative   |
| 157053 | Negative         | Negative   | Negative   |
| 157223 | Mixed/Integrated | Negative   | Negative   |

|        |                  |            |            |
|--------|------------------|------------|------------|
| 157482 | Mixed/Integrated | Mixed      | Mixed      |
| 157658 | Negative         | Negative   | Negative   |
| 157658 | Negative         | Negative   | Negative   |
| 157790 | Negative         | Negative   | Negative   |
| 157791 | Mixed/Integrated | Mixed      | Integrated |
| 157945 | Mixed/Integrated | Mixed      | Integrated |
| 158089 | Mixed/Integrated | Negative   | Integrated |
| 158107 | Negative         | Negative   | Negative   |
| 158175 | Negative         | Negative   | Negative   |
| 158176 | Mixed/Integrated | Negative   | Integrated |
| 158239 | Negative         | Negative   | Negative   |
| 158335 | Negative         | Negative   | Negative   |
| 158584 | Negative         | Negative   | Negative   |
| 158890 | Mixed/Integrated | Integrated | Integrated |
| 159021 | Negative         | Negative   | Negative   |
| 159316 | Negative         | Negative   | Negative   |
| 159317 | Negative         | Negative   | Negative   |
| 159404 | Negative         | Negative   | Negative   |
| 159727 | Negative         | Negative   | Negative   |
| 160619 | Negative         | Negative   | Negative   |
| 160622 | Negative         | Negative   | Negative   |
| 160860 | Negative         | Negative   | Negative   |
| 161192 | Mixed/Integrated | Negative   | Integrated |
| 161212 | Mixed/Integrated | Mixed      | Integrated |
| 161213 | Mixed/Integrated | Mixed      | Integrated |
| 161299 | Negative         | Negative   | Negative   |
| 161497 | Mixed/Integrated | Negative   | Negative   |
| 161587 | Negative         | Negative   | Negative   |
| 161660 | Negative         | Negative   | Negative   |
| 161894 | Mixed/Integrated | Mixed      | Mixed      |
| 161899 | Negative         | Negative   | Negative   |
| 161899 | Negative         | Negative   | Negative   |
| 161901 | Negative         | Negative   | Negative   |
| 162153 | Negative         | Negative   | Negative   |
| 162211 | Negative         | Negative   | Negative   |
| 162700 | Negative         | Negative   | Negative   |
| 162746 | Mixed/Integrated | Mixed      | Integrated |
| 162778 | Mixed/Integrated | Mixed      | Mixed      |
| 162890 | Mixed/Integrated | Negative   | Integrated |
| 163141 | Mixed/Integrated | Mixed      | Integrated |
| 163615 | Negative         | Negative   | Negative   |
| 163691 | Mixed/Integrated | Integrated | Integrated |
| 163817 | Negative         | Negative   | Negative   |
| 163988 | Negative         | Negative   | Negative   |
| 164058 | Mixed/Integrated | Mixed      | Mixed      |
| 164164 | Negative         | Negative   | Negative   |
| 164166 | Mixed/Integrated | Mixed      | Integrated |
| 164861 | Negative         | Negative   | Negative   |
| 164888 | Negative         | Negative   | Negative   |

|        |                  |          |            |
|--------|------------------|----------|------------|
| 165781 | Negative         | Negative | Negative   |
| 165995 | Negative         | Negative | Negative   |
| 166333 | Negative         | Negative | Negative   |
| 166480 | Mixed/Integrated | Mixed    | Integrated |
| 166635 | Negative         | Negative | Negative   |
| 167054 | Negative         | Negative | Negative   |
| 167056 | Mixed/Integrated | Mixed    | Mixed      |
| 167245 | Negative         | Negative | Negative   |
| 167249 | Negative         | Negative | Negative   |
| 167251 | Negative         | Negative | Negative   |
| 167253 | Mixed/Integrated | Mixed    | Mixed      |
| 167263 | Negative         | Negative | Negative   |
| 167550 | Mixed/Integrated | Negative | Negative   |
| 167593 | Negative         | Negative | Negative   |
| 167595 | Mixed/Integrated | Mixed    | Mixed      |
| 167691 | Mixed/Integrated | Negative | Integrated |
| 167898 | Mixed/Integrated | Negative | Negative   |
| 168002 | Negative         | Negative | Negative   |
| 168074 | Negative         | Negative | Negative   |
| 168455 | Mixed/Integrated | Mixed    | Mixed      |
| 168456 | Mixed/Integrated | Negative | Integrated |
| 168456 | Mixed/Integrated | Mixed    | Mixed      |
| 168499 | Negative         | Negative | Negative   |
| 168556 | Negative         | Negative | Negative   |
| 168612 | Negative         | Negative | Negative   |
| 168862 | Negative         | Negative | Negative   |
| 168930 | Negative         | Negative | Negative   |
| 169389 | Negative         | Negative | Negative   |
| 169389 | Negative         | Negative | Integrated |
| 169390 | Mixed/Integrated | Mixed    | Mixed      |
| 169410 | Negative         | Negative | Negative   |
| 169766 | Negative         | Negative | Negative   |
| 169769 | Mixed/Integrated | Mixed    | Mixed      |
| 169849 | Negative         | Negative | Negative   |
| 170279 | Mixed/Integrated | Mixed    | Mixed      |
| 170280 | Mixed/Integrated | Mixed    | Integrated |
| 170463 | Negative         | Negative | Negative   |
| 170463 | Negative         | Negative | Negative   |
| 170465 | Negative         | Negative | Negative   |
| 170961 | Mixed/Integrated | Mixed    | Integrated |
| 171173 | Mixed/Integrated | Mixed    | Mixed      |
| 171280 | Negative         | Negative | Negative   |
| 171292 | Mixed/Integrated | Negative | Integrated |
| 171326 | Negative         | Negative | Negative   |
| 171368 | Mixed/Integrated | Negative | Integrated |
| 171544 | Negative         | Negative | Negative   |
| 171692 | Mixed/Integrated | Negative | Integrated |
| 172278 | Mixed/Integrated | Mixed    | Mixed      |
| 172803 | Negative         | Negative | Negative   |

|        |                  |          |            |
|--------|------------------|----------|------------|
| 172890 | Negative         | Negative | Negative   |
| 173038 | Negative         | Negative | Negative   |
| 173172 | Negative         | Negative | Negative   |
| 173369 | Mixed/Integrated | Negative | Negative   |
| 173946 | Negative         | Negative | Negative   |
| 174931 | Negative         | Negative | Negative   |
| 175683 | Negative         | Negative | Negative   |
| 175883 | Negative         | Negative | Negative   |
| 176483 | Negative         | Negative | Negative   |
| 176858 | Mixed/Integrated | Mixed    | Mixed      |
| 177149 | Mixed/Integrated | Negative | Integrated |
| 177389 | Negative         | Negative | Negative   |
| 177391 | Mixed/Integrated | Mixed    | Mixed      |
| 177484 | Negative         | Negative | Negative   |
| 177657 | Negative         | Negative | Negative   |
| 177896 | Negative         | Negative | Negative   |
| 178083 | Negative         | Negative | Negative   |
| 178239 | Negative         | Negative | Negative   |
| 178284 | Negative         | Negative | Negative   |
| 178452 | Negative         | Negative | Negative   |
| 178484 | Negative         | Negative | Negative   |
| 178684 | Negative         | Negative | Negative   |
| 179189 | Mixed/Integrated | Negative | Integrated |
| 179275 | Negative         | Mixed    | Mixed      |
| 179276 | Negative         | Negative | Negative   |
| 179281 | Negative         | Negative | Negative   |
| 179282 | Negative         | Negative | Negative   |
| 179284 | Mixed/Integrated | Mixed    | Integrated |
| 179285 | Mixed/Integrated | Mixed    | Integrated |
| 179855 | Negative         | Negative | Negative   |
| 180277 | Negative         | Negative | Negative   |
| 180457 | Mixed/Integrated | Negative | Integrated |
| 180685 | Negative         | Negative | Negative   |
| 180872 | Negative         | Negative | Negative   |
| 180885 | Negative         | Negative | Negative   |
| 180982 | Negative         | Negative | Negative   |
| 180983 | Negative         | Negative | Negative   |
| 180985 | Mixed/Integrated | Mixed    | Mixed      |
| 181088 | Mixed/Integrated | Negative | Integrated |
| 181421 | Mixed/Integrated | Mixed    | Mixed      |
| 181426 | Negative         | Negative | Negative   |
| 181657 | Negative         | Negative | Negative   |
| 181661 | Negative         | Negative | Negative   |
| 181933 | Mixed/Integrated | Negative | Integrated |
| 181996 | Mixed/Integrated | Mixed    | Mixed      |
| 182012 | Negative         | Negative | Negative   |
| 182191 | Mixed/Integrated | Negative | Integrated |
| 182479 | Negative         | Negative | Negative   |
| 182480 | Negative         | Negative | Negative   |

|        |                  |          |            |
|--------|------------------|----------|------------|
| 182482 | Negative         | Negative | Negative   |
| 182486 | Negative         | Negative | Negative   |
| 182487 | Negative         | Negative | Negative   |
| 182488 | Mixed/Integrated | Mixed    | Integrated |
| 182688 | Mixed/Integrated | Negative | Integrated |
| 182718 | Negative         | Negative | Negative   |
| 182798 | Mixed/Integrated | Mixed    | Mixed      |
| 183084 | Negative         | Negative | Negative   |
| 183255 | Negative         | Negative | Negative   |
| 183256 | Mixed/Integrated | Mixed    | Integrated |
| 183264 | Mixed/Integrated | Negative | Integrated |
| 184287 | Negative         | Negative | Negative   |
| 184287 | Negative         | Negative | Negative   |
| 184325 | Mixed/Integrated | Mixed    | Mixed      |
| 184615 | Negative         | Negative | Negative   |
| 184689 | Mixed/Integrated | Negative | Integrated |
| 185150 | Negative         | Negative | Negative   |
| 185173 | Negative         | Negative | Negative   |
| 185658 | Negative         | Negative | Negative   |
| 185696 | Negative         | Negative | Negative   |
| 185927 | Mixed/Integrated | Negative | Negative   |
| 186474 | Mixed/Integrated | Mixed    | Mixed      |
| 186489 | Negative         | Negative | Negative   |
| 186996 | Negative         | Negative | Negative   |
| 187056 | Negative         | Negative | Negative   |
| 187244 | Negative         | Negative | Negative   |
| 187525 | Mixed/Integrated | Mixed    | Mixed      |
| 188689 | Negative         | Negative | Negative   |
| 188876 | Mixed/Integrated | Mixed    | Integrated |
| 188939 | Negative         | Negative | Negative   |
| 189587 | Negative         | Negative | Negative   |
| 189646 | Negative         | Negative | Negative   |
| 189649 | Mixed/Integrated | Mixed    | Mixed      |
| 190069 | Negative         | Negative | Negative   |
| 190158 | Negative         | Negative | Negative   |
| 190472 | Mixed/Integrated | Mixed    | Integrated |
| 190731 | Negative         | Negative | Negative   |
| 190953 | Negative         | Negative | Negative   |
| 191012 | Negative         | Negative | Negative   |
| 191636 | Mixed/Integrated | Mixed    | Integrated |
| 192331 | Negative         | Negative | Negative   |
| 192424 | Negative         | Negative | Negative   |
| 193053 | Mixed/Integrated | Mixed    | Mixed      |
| 193672 | Negative         | Negative | Negative   |
| 193834 | Negative         | Negative | Negative   |
| 193856 | Negative         | Negative | Negative   |
| 193856 | Negative         | Negative | Negative   |
| 193932 | Mixed/Integrated | Mixed    | Integrated |
| 194475 | Negative         | Negative | Negative   |



|        |                  |            |            |
|--------|------------------|------------|------------|
| 194701 | Negative         | Negative   | Negative   |
| 195082 | Negative         | Negative   | Negative   |
| 195115 | Negative         | Negative   | Negative   |
| 196560 | Mixed/Integrated | Negative   | Integrated |
| 196716 | Negative         | Negative   | Negative   |
| 196876 | Mixed/Integrated | Mixed      | Integrated |
| 197676 | Negative         | Negative   | Negative   |
| 198065 | Mixed/Integrated | Mixed      | Integrated |
| 198333 | Negative         | Negative   | Negative   |
| 198535 | Mixed/Integrated | Negative   | Negative   |
| 199478 | Mixed/Integrated | Negative   | Integrated |
| 199700 | Mixed/Integrated | Mixed      | Integrated |
| 199916 | Negative         | Negative   | Negative   |
| 199917 | Negative         | Negative   | Negative   |
| 199918 | Negative         | Negative   | Negative   |
| 200386 | Mixed/Integrated | Integrated | Integrated |
| 200588 | Negative         | Negative   | Negative   |
| 201089 | Negative         | Negative   | Negative   |
| 207039 | Negative         | Negative   | Negative   |
| 208044 | Negative         | Negative   | Negative   |
| 209686 | Mixed/Integrated | Negative   | Integrated |
| 210335 | Mixed/Integrated | Mixed      | Mixed      |
| 211590 | Negative         | Negative   | Negative   |
| 211591 | Negative         | Negative   | Negative   |
| 212294 | Mixed/Integrated | Mixed      | Mixed      |
| 213270 | Negative         | Negative   | Negative   |
| 213687 | Mixed/Integrated | Mixed      | Integrated |
| 214682 | Negative         | Negative   | Negative   |
| 215122 | Negative         | Negative   | Negative   |
| 216288 | Negative         | Negative   | Negative   |
| 217884 | Negative         | Negative   | Negative   |
| 218962 | Negative         | Negative   | Negative   |
| 219391 | Negative         | Negative   | Negative   |
| 219688 | Mixed/Integrated | Mixed      | Integrated |
| 220200 | Negative         | Negative   | Negative   |
| 221523 | Negative         | Negative   | Negative   |
| 222685 | Negative         | Negative   | Negative   |
| 223754 | Negative         | Negative   | Negative   |
| 224098 | Negative         | Negative   | Negative   |
| 226550 | Negative         | Negative   | Negative   |
| 229702 | Mixed/Integrated | Negative   | Integrated |
| 229745 | Negative         | Negative   | Negative   |
| 229762 | Negative         | Negative   | Negative   |
| 231627 | Negative         | Negative   | Negative   |
| 232535 | Negative         | Negative   | Negative   |
| 233040 | Negative         | Negative   | Negative   |
| 233510 | Negative         | Negative   | Negative   |
| 233513 | Negative         | Negative   | Negative   |
| 233787 | Negative         | Negative   | Negative   |

|        |                  |            |            |
|--------|------------------|------------|------------|
| 233981 | Negative         | Negative   | Negative   |
| 234451 | Negative         | Negative   | Negative   |
| 236805 | Negative         | Negative   | Negative   |
| 239628 | Negative         | Negative   | Negative   |
| 241040 | Negative         | Negative   | Negative   |
| 243091 | Mixed/Integrated | Negative   | Negative   |
| 243866 | Negative         | Negative   | Negative   |
| 246016 | Negative         | Negative   | Negative   |
| 246353 | Negative         | Negative   | Negative   |
| 246873 | Negative         | Negative   | Negative   |
| 247291 | Mixed/Integrated | Negative   | Negative   |
| 248374 | Negative         | Negative   | Negative   |
| 248491 | Mixed/Integrated | Negative   | Negative   |
| 250772 | Negative         | Negative   | Negative   |
| 251407 | Negative         | Negative   | Negative   |
| 255093 | Negative         | Negative   | Negative   |
| 257134 | Mixed/Integrated | Negative   | Negative   |
| 259293 | Negative         | Negative   | Negative   |
| 259869 | Negative         | Negative   | Negative   |
| 260166 | Mixed/Integrated | Negative   | Negative   |
| 262683 | Negative         | Negative   | Negative   |
| 262685 | Negative         | Negative   | Negative   |
| 263199 | Negative         | Negative   | Negative   |
| 267242 | Negative         | Negative   | Negative   |
| 268334 | Mixed/Integrated | Negative   | Integrated |
| 268899 | Negative         | Negative   | Negative   |
| 268902 | Mixed/Integrated | Negative   | Negative   |
| 273984 | Mixed/Integrated | Integrated | Integrated |
| 276341 | Negative         | Negative   | Negative   |
| 276677 | Negative         | Negative   | Negative   |
| 279373 | Negative         | Negative   | Negative   |
| 279379 | Negative         | Negative   | Negative   |
| 279626 | Mixed/Integrated | Integrated | Integrated |
| 279628 | Negative         | Negative   | Negative   |
| 280761 | Mixed/Integrated | Integrated | Integrated |
| 281722 | Negative         | Negative   | Negative   |
| 282742 | Negative         | Negative   | Negative   |
| 283225 | Mixed/Integrated | Negative   | Integrated |
| 286805 | Mixed/Integrated | Mixed      | Mixed      |
| 286807 | Mixed/Integrated | Mixed      | Mixed      |
| 286808 | Mixed/Integrated | Mixed      | Mixed      |
| 290780 | Negative         | Negative   | Negative   |
| 291294 | Negative         | Negative   | Negative   |
| 291927 | Mixed/Integrated | Mixed      | Integrated |
| 296894 | Negative         | Negative   | Negative   |
| 307869 | Negative         | Negative   | Negative   |
| 312388 | Negative         | Negative   | Negative   |
| 314082 | Negative         | Negative   | Negative   |
| 314646 | Negative         | Negative   | Negative   |

|        |                  |          |            |
|--------|------------------|----------|------------|
| 321703 | Negative         | Negative | Negative   |
| 322645 | Mixed/Integrated | Mixed    | Integrated |
| 328407 | Mixed/Integrated | Mixed    | Mixed      |
| 343287 | Negative         | Negative | Negative   |
| 355849 | Negative         | Negative | Negative   |
| 358490 | Negative         | Negative | Negative   |

**Table S9. Detection results of DIPS, E2/E6E7 ratio analysis and multiple E1-L1/E6E7 ratio analysis in the HPV 18-positive cases.**

| <b>Patient No.</b> | <b>DIPS</b>      | <b>E2/E6E7 ratio analysis</b> | <b>E1-L1/E6E7 ratio analysis</b> |
|--------------------|------------------|-------------------------------|----------------------------------|
| 112326             | Negative         | Negative                      | Negative                         |
| 112400             | Mixed/Integrated | Negative                      | Integrated                       |
| 112760             | Mixed/Integrated | Negative                      | Integrated                       |
| 113318             | Mixed/Integrated | Integrated                    | Mixed                            |
| 115430             | Mixed/Integrated | Integrated                    | Mixed                            |
| 116898             | Negative         | Negative                      | Negative                         |
| 121041             | Negative         | Negative                      | Negative                         |
| 121044             | Mixed/Integrated | Mixed                         | Mixed                            |
| 121762             | Negative         | Negative                      | Negative                         |
| 122712             | Mixed/Integrated | Negative                      | Integrated                       |
| 123202             | Negative         | Negative                      | Negative                         |
| 123320             | Negative         | Negative                      | Negative                         |
| 123463             | Mixed/Integrated | Mixed                         | Mixed                            |
| 124214             | Mixed/Integrated | Integrated                    | Mixed                            |
| 124288             | Mixed/Integrated | Integrated                    | Mixed                            |
| 125125             | Negative         | Negative                      | Negative                         |
| 125250             | Mixed/Integrated | Integrated                    | Integrated                       |
| 125712             | Negative         | Negative                      | Negative                         |
| 125933             | Negative         | Negative                      | Negative                         |
| 126206             | Negative         | Negative                      | Negative                         |
| 126207             | Mixed/Integrated | Integrated                    | Integrated                       |
| 126510             | Negative         | Negative                      | Negative                         |
| 132385             | Mixed/Integrated | Integrated                    | Mixed                            |
| 136877             | Negative         | Negative                      | Negative                         |
| 137637             | Negative         | Negative                      | Negative                         |
| 137884             | Negative         | Negative                      | Negative                         |
| 138007             | Mixed/Integrated | Mixed                         | Integrated                       |
| 144965             | Negative         | Negative                      | Negative                         |
| 144966             | Mixed/Integrated | Mixed                         | Integrated                       |
| 145357             | Negative         | Negative                      | Negative                         |
| 145652             | Negative         | Negative                      | Negative                         |
| 145656             | Mixed/Integrated | Mixed                         | Mixed                            |
| 147456             | Mixed/Integrated | Negative                      | Integrated                       |
| 148599             | Negative         | Negative                      | Negative                         |
| 150656             | Negative         | Negative                      | Negative                         |
| 151787             | Negative         | Negative                      | Negative                         |
| 151823             | Negative         | Negative                      | Negative                         |
| 151825             | Mixed/Integrated | Mixed                         | Integrated                       |

|        |                  |            |            |
|--------|------------------|------------|------------|
| 153539 | Negative         | Negative   | Integrated |
| 153540 | Mixed/Integrated | Mixed      | Integrated |
| 154051 | Negative         | Negative   | Negative   |
| 154052 | Mixed/Integrated | Mixed      | Integrated |
| 158216 | Negative         | Negative   | Negative   |
| 159370 | Mixed/Integrated | Mixed      | Mixed      |
| 159470 | Mixed/Integrated | Negative   | Integrated |
| 160755 | Negative         | Negative   | Negative   |
| 161034 | Mixed/Integrated | Mixed      | Integrated |
| 161250 | Negative         | Negative   | Negative   |
| 161252 | Mixed/Integrated | Mixed      | Integrated |
| 161362 | Negative         | Negative   | Negative   |
| 161363 | Negative         | Negative   | Negative   |
| 162279 | Negative         | Negative   | Negative   |
| 162280 | Mixed/Integrated | Negative   | Integrated |
| 162455 | Negative         | Negative   | Negative   |
| 163821 | Negative         | Negative   | Negative   |
| 163930 | Mixed/Integrated | Mixed      | Integrated |
| 164181 | Mixed/Integrated | Mixed      | Integrated |
| 164646 | Negative         | Negative   | Negative   |
| 165413 | Mixed/Integrated | Negative   | Integrated |
| 165627 | Mixed/Integrated | Mixed      | Integrated |
| 166729 | Mixed/Integrated | Negative   | Integrated |
| 166913 | Mixed/Integrated | Mixed      | Integrated |
| 171076 | Negative         | Negative   | Negative   |
| 175657 | Mixed/Integrated | Mixed      | Integrated |
| 175662 | Mixed/Integrated | Integrated | Mixed      |
| 176038 | Negative         | Negative   | Negative   |
| 176490 | Negative         | Negative   | Negative   |
| 177327 | Negative         | Negative   | Negative   |
| 177954 | Mixed/Integrated | Integrated | Mixed      |
| 179056 | Negative         | Negative   | Negative   |
| 179264 | Mixed/Integrated | Integrated | Integrated |
| 180062 | Negative         | Negative   | Negative   |
| 181318 | Negative         | Negative   | Negative   |
| 181441 | Negative         | Negative   | Negative   |
| 181484 | Mixed/Integrated | Negative   | Integrated |
| 182130 | Negative         | Negative   | Negative   |
| 182888 | Mixed/Integrated | Integrated | Mixed      |
| 183242 | Negative         | Negative   | Negative   |
| 184234 | Negative         | Negative   | Negative   |
| 185807 | Negative         | Negative   | Negative   |
| 187243 | Mixed/Integrated | Negative   | Integrated |
| 187611 | Negative         | Negative   | Negative   |
| 188965 | Mixed/Integrated | Integrated | Mixed      |
| 189081 | Negative         | Negative   | Negative   |
| 189159 | Mixed/Integrated | Mixed      | Integrated |
| 189187 | Negative         | Negative   | Negative   |
| 189543 | Negative         | Integrated | Integrated |

|        |                  |            |            |
|--------|------------------|------------|------------|
| 189835 | Mixed/Integrated | Mixed      | Mixed      |
| 190259 | Negative         | Negative   | Negative   |
| 190509 | Mixed/Integrated | Integrated | Integrated |
| 190665 | Negative         | Negative   | Negative   |
| 191010 | Negative         | Negative   | Negative   |
| 191101 | Mixed/Integrated | Mixed      | Mixed      |
| 191598 | Negative         | Negative   | Negative   |
| 192353 | Negative         | Negative   | Negative   |
| 194563 | Mixed/Integrated | Mixed      | Mixed      |
| 194960 | Mixed/Integrated | Integrated | Mixed      |
| 195843 | Negative         | Negative   | Negative   |
| 196293 | Negative         | Negative   | Negative   |
| 196743 | Negative         | Negative   | Negative   |
| 198818 | Mixed/Integrated | Integrated | Mixed      |
| 199064 | Mixed/Integrated | Integrated | Mixed      |
| 200794 | Negative         | Negative   | Negative   |
| 213200 | Negative         | Negative   | Negative   |
| 214912 | Mixed/Integrated | Mixed      | Integrated |
| 219682 | Negative         | Negative   | Negative   |
| 223403 | Negative         | Negative   | Negative   |
| 224721 | Negative         | Negative   | Negative   |
| 226779 | Negative         | Negative   | Negative   |
| 229030 | Mixed/Integrated | Negative   | Integrated |
| 239126 | Mixed/Integrated | Integrated | Mixed      |
| 239391 | Negative         | Negative   | Negative   |
| 245113 | Mixed/Integrated | Negative   | Integrated |
| 245216 | Negative         | Negative   | Negative   |
| 246326 | Mixed/Integrated | Negative   | Integrated |
| 253159 | Negative         | Negative   | Negative   |
| 262160 | Negative         | Negative   | Negative   |
| 274144 | Negative         | Negative   | Negative   |
| 274144 | Negative         | Negative   | Negative   |
| 274818 | Negative         | Negative   | Negative   |
| 276169 | Negative         | Negative   | Negative   |
| 278193 | Negative         | Negative   | Negative   |
| 388898 | Mixed/Integrated | Negative   | Integrated |
| 441548 | Negative         | Negative   | Negative   |

**Table S10. Detection results of DIPS, E2/E6E7 ratio analysis and multiple E1-L1/E6E7 ratio analysis in the HPV 26-positive cases.**

| Patient No. | DIPS             | E2/E6E7 ratio analysis | E1-L1/E6E7 ratio analysis |
|-------------|------------------|------------------------|---------------------------|
| 111213      | Negative         | Negative               | Negative                  |
| 214834      | Mixed/Integrated | Mixed                  | Mixed                     |

**Table S11. Detection results of DIPS, E2/E6E7 ratio analysis and multiple E1-L1/E6E7 ratio analysis in the HPV 31-positive cases.**

| Patient No. | DIPS | E2/E6E7 ratio analysis | E1-L1/E6E7 ratio |
|-------------|------|------------------------|------------------|
|-------------|------|------------------------|------------------|

|        |                  |            | <b>analysis</b> |
|--------|------------------|------------|-----------------|
| 111516 | Negative         | Negative   | Negative        |
| 148091 | Negative         | Negative   | Negative        |
| 100154 | Mixed/Integrated | Mixed      | Mixed           |
| 104582 | Mixed/Integrated | Integrated | Integrated      |
| 109010 | Mixed/Integrated | Integrated | Integrated      |
| 112678 | Negative         | Negative   | Negative        |
| 123028 | Negative         | Negative   | Negative        |
| 124686 | Negative         | Negative   | Negative        |
| 125548 | Mixed/Integrated | Negative   | Negative        |
| 133858 | Mixed/Integrated | Mixed      | Integrated      |
| 137255 | Mixed/Integrated | Mixed      | Integrated      |
| 139077 | Mixed/Integrated | Negative   | Negative        |
| 139788 | Mixed/Integrated | Mixed      | Mixed           |
| 141013 | Mixed/Integrated | Mixed      | Integrated      |
| 143682 | Negative         | Negative   | Negative        |
| 145994 | Negative         | Negative   | Negative        |
| 148168 | Mixed/Integrated | Mixed      | Integrated      |
| 148229 | Negative         | Negative   | Negative        |
| 149441 | Negative         | Negative   | Negative        |
| 150256 | Negative         | Negative   | Negative        |
| 152339 | Negative         | Negative   | Negative        |
| 154333 | Negative         | Negative   | Negative        |
| 155065 | Negative         | Negative   | Negative        |
| 156530 | Mixed/Integrated | Mixed      | Mixed           |
| 156548 | Negative         | Negative   | Negative        |
| 156775 | Negative         | Negative   | Negative        |
| 158876 | Negative         | Negative   | Negative        |
| 160072 | Mixed/Integrated | Integrated | Integrated      |
| 160826 | Mixed/Integrated | Negative   | Negative        |
| 165166 | Mixed/Integrated | Integrated | Integrated      |
| 166328 | Negative         | Negative   | Negative        |
| 168654 | Mixed/Integrated | Integrated | Integrated      |
| 174170 | Negative         | Negative   | Negative        |
| 174703 | Mixed/Integrated | Negative   | Negative        |
| 174820 | Mixed/Integrated | Integrated | Integrated      |
| 177356 | Negative         | Negative   | Negative        |
| 180223 | Mixed/Integrated | Integrated | Integrated      |
| 181369 | Negative         | Negative   | Negative        |
| 184650 | Mixed/Integrated | Integrated | Integrated      |
| 188937 | Mixed/Integrated | Mixed      | Mixed           |
| 193510 | Mixed/Integrated | Integrated | Integrated      |
| 194806 | Negative         | Negative   | Negative        |
| 197282 | Mixed/Integrated | Negative   | Negative        |
| 204686 | Mixed/Integrated | Negative   | Integrated      |
| 207021 | Negative         | Negative   | Negative        |
| 208414 | Negative         | Negative   | Negative        |
| 210885 | Mixed/Integrated | Integrated | Integrated      |
| 211094 | Mixed/Integrated | Mixed      | Integrated      |

|        |                  |            |            |
|--------|------------------|------------|------------|
| 212134 | Negative         | Negative   | Negative   |
| 212834 | Negative         | Negative   | Negative   |
| 213545 | Mixed/Integrated | Mixed      | Integrated |
| 214615 | Negative         | Negative   | Negative   |
| 215888 | Negative         | Negative   | Negative   |
| 217086 | Negative         | Negative   | Negative   |
| 220954 | Negative         | Negative   | Negative   |
| 222400 | Negative         | Negative   | Negative   |
| 225944 | Negative         | Negative   | Negative   |
| 227812 | Negative         | Negative   | Negative   |
| 231259 | Negative         | Negative   | Negative   |
| 240117 | Negative         | Negative   | Negative   |
| 247157 | Mixed/Integrated | Negative   | Negative   |
| 256299 | Mixed/Integrated | Integrated | Integrated |
| 256625 | Mixed/Integrated | Mixed      | Mixed      |
| 259668 | Mixed/Integrated | Integrated | Integrated |
| 261370 | Negative         | Negative   | Negative   |
| 277855 | Negative         | Negative   | Negative   |
| 277858 | Mixed/Integrated | Mixed      | Mixed      |
| 282817 | Negative         | Negative   | Negative   |
| 282818 | Mixed/Integrated | Mixed      | Mixed      |
| 282820 | Mixed/Integrated | Mixed      | Integrated |
| 291223 | Negative         | Negative   | Negative   |
| 312148 | Mixed/Integrated | Mixed      | Integrated |
| 325603 | Negative         | Negative   | Negative   |
| 349364 | Mixed/Integrated | Mixed      | Mixed      |
| 353495 | Negative         | Negative   | Negative   |
| 488306 | Negative         | Negative   | Negative   |
| 665595 | Negative         | Negative   | Negative   |
| 680063 | Negative         | Negative   | Negative   |
| 735515 | Negative         | Negative   | Negative   |

**Table S12. Detection results of DIPS, E2/E6E7 ratio analysis and multiple E1-L1/E6E7 ratio analysis in the HPV 33-positive cases.**

| <b>Patient No.</b> | <b>DIPS</b>      | <b>E2/E6E7 ratio analysis</b> | <b>E1-L1/E6E7 ratio analysis</b> |
|--------------------|------------------|-------------------------------|----------------------------------|
| 212306             | Negative         | Negative                      | Negative                         |
| 138664             | Negative         | Negative                      | Negative                         |
| 100835             | Negative         | Negative                      | Negative                         |
| 102127             | Negative         | Negative                      | Negative                         |
| 104022             | Negative         | Negative                      | Negative                         |
| 108976             | Mixed/Integrated | Mixed                         | Integrated                       |
| 109966             | Mixed/Integrated | Mixed                         | Integrated                       |
| 112283             | Negative         | Negative                      | Negative                         |
| 117976             | Mixed/Integrated | Mixed                         | Mixed                            |
| 118710             | Mixed/Integrated | Mixed                         | Integrated                       |
| 122305             | Negative         | Negative                      | Negative                         |
| 123583             | Mixed/Integrated | Mixed                         | Integrated                       |
| 123791             | Negative         | Negative                      | Negative                         |

|        |                  |            |            |
|--------|------------------|------------|------------|
| 124041 | Negative         | Negative   | Negative   |
| 124652 | Negative         | Negative   | Negative   |
| 130889 | Mixed/Integrated | Mixed      | Integrated |
| 132410 | Negative         | Negative   | Negative   |
| 132740 | Negative         | Negative   | Negative   |
| 132903 | Negative         | Negative   | Negative   |
| 138697 | Negative         | Negative   | Negative   |
| 142675 | Mixed/Integrated | Mixed      | Integrated |
| 144326 | Mixed/Integrated | Mixed      | Integrated |
| 145271 | Mixed/Integrated | Mixed      | Mixed      |
| 147910 | Negative         | Negative   | Negative   |
| 153355 | Negative         | Negative   | Negative   |
| 155711 | Negative         | Negative   | Negative   |
| 155712 | Negative         | Negative   | Negative   |
| 158070 | Negative         | Negative   | Negative   |
| 160125 | Mixed/Integrated | Mixed      | Integrated |
| 161775 | Mixed/Integrated | Mixed      | Integrated |
| 161822 | Mixed/Integrated | Negative   | Integrated |
| 168378 | Negative         | Negative   | Negative   |
| 168952 | Negative         | Negative   | Negative   |
| 169277 | Negative         | Negative   | Negative   |
| 172194 | Mixed/Integrated | Integrated | Integrated |
| 172903 | Mixed/Integrated | Mixed      | Integrated |
| 173326 | Mixed/Integrated | Mixed      | Integrated |
| 178558 | Mixed/Integrated | Negative   | Integrated |
| 179379 | Negative         | Negative   | Negative   |
| 184219 | Negative         | Negative   | Negative   |
| 184770 | Negative         | Negative   | Negative   |
| 185456 | Negative         | Negative   | Negative   |
| 185629 | Mixed/Integrated | Mixed      | Integrated |
| 185870 | Negative         | Negative   | Negative   |
| 190110 | Mixed/Integrated | Mixed      | Integrated |
| 190382 | Mixed/Integrated | Mixed      | Integrated |
| 191052 | Mixed/Integrated | Mixed      | Integrated |
| 191971 | Negative         | Negative   | Negative   |
| 194128 | Negative         | Negative   | Negative   |
| 195971 | Mixed/Integrated | Mixed      | Integrated |
| 197049 | Negative         | Negative   | Negative   |
| 197092 | Negative         | Negative   | Negative   |
| 197589 | Mixed/Integrated | Mixed      | Mixed      |
| 210352 | Mixed/Integrated | Integrated | Integrated |
| 217557 | Mixed/Integrated | Negative   | Integrated |
| 219024 | Mixed/Integrated | Negative   | Integrated |
| 219755 | Negative         | Negative   | Negative   |
| 219771 | Negative         | Negative   | Negative   |
| 220122 | Negative         | Negative   | Negative   |
| 222602 | Mixed/Integrated | Negative   | Integrated |
| 231067 | Mixed/Integrated | Integrated | Integrated |
| 232354 | Negative         | Negative   | Negative   |



|        |                  |            |            |
|--------|------------------|------------|------------|
| 233833 | Negative         | Integrated | Integrated |
| 245045 | Negative         | Negative   | Negative   |
| 265740 | Mixed/Integrated | Integrated | Integrated |
| 275760 | Negative         | Negative   | Negative   |
| 278229 | Negative         | Negative   | Negative   |
| 282235 | Mixed/Integrated | Integrated | Integrated |
| 290756 | Negative         | Negative   | Negative   |
| 290992 | Negative         | Negative   | Negative   |
| 294784 | Negative         | Negative   | Negative   |
| 295778 | Mixed/Integrated | Mixed      | Integrated |
| 295949 | Negative         | Negative   | Negative   |
| 312258 | Negative         | Negative   | Negative   |
| 318024 | Negative         | Negative   | Negative   |
| 327629 | Negative         | Negative   | Negative   |
| 344399 | Mixed/Integrated | Mixed      | Mixed      |
| 391456 | Negative         | Negative   | Negative   |
| 414672 | Mixed/Integrated | Mixed      | Mixed      |
| 460664 | Mixed/Integrated | Integrated | Integrated |
| 467264 | Mixed/Integrated | Mixed      | Mixed      |
| 498065 | Negative         | Negative   | Negative   |
| 599268 | Mixed/Integrated | Mixed      | Mixed      |
| 600709 | Negative         | Negative   | Negative   |
| 617049 | Negative         | Negative   | Negative   |
| 636301 | Negative         | Negative   | Negative   |
| 701363 | Mixed/Integrated | Mixed      | Mixed      |
| 819486 | Negative         | Negative   | Negative   |
| 902724 | Negative         | Negative   | Negative   |

**Table S13. Detection results of DIPS, E2/E6E7 ratio analysis and multiple E1-L1/E6E7 ratio analysis in the HPV 35-positive cases.**

| <b>Patient No.</b> | <b>DIPS</b>      | <b>E2/E6E7 ratio analysis</b> | <b>E1-L1/E6E7 ratio analysis</b> |
|--------------------|------------------|-------------------------------|----------------------------------|
| 157835             | Negative         | Negative                      | Negative                         |
| 208488             | Negative         | Negative                      | Negative                         |
| 102988             | Negative         | Integrated                    | Integrated                       |
| 154079             | Mixed/Integrated | Mixed                         | Mixed                            |
| 155478             | Mixed/Integrated | Mixed                         | Mixed                            |
| 159571             | Negative         | Negative                      | Negative                         |
| 160446             | Negative         | Negative                      | Negative                         |
| 160739             | Mixed/Integrated | Integrated                    | Integrated                       |
| 176356             | Negative         | Integrated                    | Integrated                       |
| 189906             | Negative         | Negative                      | Negative                         |
| 223208             | Mixed/Integrated | Negative                      | Integrated                       |
| 224400             | Mixed/Integrated | Mixed                         | Mixed                            |
| 276198             | Negative         | Negative                      | Negative                         |
| 285333             | Negative         | Negative                      | Negative                         |
| 286236             | Mixed/Integrated | Negative                      | Integrated                       |
| 287317             | Negative         | Negative                      | Negative                         |
| 295350             | Negative         | Negative                      | Negative                         |

|        |                  |            |            |
|--------|------------------|------------|------------|
| 299672 | Negative         | Negative   | Negative   |
| 300908 | Negative         | Negative   | Negative   |
| 302837 | Mixed/Integrated | Mixed      | Mixed      |
| 365858 | Negative         | Negative   | Negative   |
| 372861 | Mixed/Integrated | Negative   | Integrated |
| 377288 | Negative         | Negative   | Negative   |
| 384701 | Negative         | Negative   | Negative   |
| 390204 | Negative         | Negative   | Negative   |
| 391290 | Negative         | Negative   | Negative   |
| 408586 | Negative         | Negative   | Negative   |
| 428846 | Mixed/Integrated | Mixed      | Mixed      |
| 764866 | Mixed/Integrated | Integrated | Integrated |

**Table S14. Detection results of DIPS, E2/E6E7 ratio analysis and multiple E1-L1/E6E7 ratio analysis in the HPV 39-positive cases.**

| <b>Patient No.</b> | <b>DIPS</b>      | <b>E2/E6E7 ratio analysis</b> | <b>E1-L1/E6E7 ratio analysis</b> |
|--------------------|------------------|-------------------------------|----------------------------------|
| 136573             | Negative         | Negative                      | Negative                         |
| 185076             | Negative         | Negative                      | Negative                         |
| 106876             | Mixed/Integrated | Integrated                    | Integrated                       |
| 109830             | Mixed/Integrated | Mixed                         | Mixed                            |
| 115641             | Negative         | Negative                      | Negative                         |
| 142148             | Mixed/Integrated | Mixed                         | Mixed                            |
| 142164             | Negative         | Negative                      | Negative                         |
| 146202             | Negative         | Negative                      | Negative                         |
| 147429             | Negative         | Negative                      | Negative                         |
| 154672             | Negative         | Negative                      | Negative                         |
| 181735             | Mixed/Integrated | Negative                      | Integrated                       |
| 183437             | Mixed/Integrated | Mixed                         | Mixed                            |
| 184062             | Negative         | Negative                      | Negative                         |
| 186750             | Mixed/Integrated | Integrated                    | Integrated                       |
| 194591             | Mixed/Integrated | Mixed                         | Mixed                            |
| 196599             | Negative         | Negative                      | Negative                         |
| 201392             | Mixed/Integrated | Mixed                         | Mixed                            |
| 207620             | Negative         | Negative                      | Negative                         |
| 212177             | Mixed/Integrated | Integrated                    | Integrated                       |
| 216233             | Mixed/Integrated | Mixed                         | Mixed                            |
| 263063             | Negative         | Negative                      | Negative                         |
| 319670             | Negative         | Negative                      | Negative                         |
| 319670             | Negative         | Negative                      | Negative                         |
| 444704             | Negative         | Negative                      | Negative                         |
| 483542             | Negative         | Negative                      | Negative                         |
| 494628             | Negative         | Negative                      | Negative                         |
| 501405             | Mixed/Integrated | Negative                      | Integrated                       |
| 513723             | Mixed/Integrated | Mixed                         | Mixed                            |
| 611626             | Negative         | Negative                      | Negative                         |
| 720102             | Negative         | Negative                      | Negative                         |
| 729465             | Negative         | Negative                      | Negative                         |
| 752867             | Negative         | Negative                      | Negative                         |

|        |                  |          |            |
|--------|------------------|----------|------------|
| 775489 | Negative         | Negative | Negative   |
| 910816 | Mixed/Integrated | Negative | Integrated |
| 983949 | Mixed/Integrated | Mixed    | Mixed      |

**Table S15. Detection results of DIPS, E2/E6E7 ratio analysis and multiple E1-L1/E6E7 ratio analysis in the HPV 41-positive cases.**

| Patient No. | DIPS     | E2/E6E7 ratio analysis | E1-L1/E6E7 ratio analysis |
|-------------|----------|------------------------|---------------------------|
| 189250      | Negative | Negative               | Negative                  |
| 273781      | Negative | Negative               | Negative                  |
| 195880      | Negative | Negative               | Negative                  |

**Table S16. Detection results of DIPS, E2/E6E7 ratio analysis and multiple E1-L1/E6E7 ratio analysis in the HPV 42-positive cases.**

| Patient No. | DIPS             | E2/E6E7 ratio analysis | E1-L1/E6E7 ratio analysis |
|-------------|------------------|------------------------|---------------------------|
| 179630      | Negative         | Negative               | Negative                  |
| 576561      | Negative         | Negative               | Negative                  |
| 215633      | Negative         | Negative               | Negative                  |
| 226983      | Mixed/Integrated | Negative               | Negative                  |
| 236801      | Negative         | Negative               | Negative                  |

**Table S17. Detection results of DIPS, E2/E6E7 ratio analysis and multiple E1-L1/E6E7 ratio analysis in the HPV 45-positive cases.**

| Patient No. | DIPS             | E2/E6E7 ratio analysis | E1-L1/E6E7 ratio analysis |
|-------------|------------------|------------------------|---------------------------|
| 398345      | Negative         | Negative               | Negative                  |
| 102706      | Negative         | Negative               | Negative                  |
| 180759      | Mixed/Integrated | Mixed                  | Mixed                     |
| 186083      | Mixed/Integrated | Mixed                  | Mixed                     |
| 507109      | Mixed/Integrated | Mixed                  | Mixed                     |
| 612676      | Negative         | Negative               | Negative                  |
| 718312      | Mixed/Integrated | Mixed                  | Mixed                     |
| 806524      | Negative         | Negative               | Negative                  |

**Table S18. Detection results of DIPS, E2/E6E7 ratio analysis and multiple E1-L1/E6E7 ratio analysis in the HPV 51-positive cases.**

| Patient No. | DIPS             | E2/E6E7 ratio analysis | E1-L1/E6E7 ratio analysis |
|-------------|------------------|------------------------|---------------------------|
| 104450      | Negative         | Negative               | Negative                  |
| 130826      | Negative         | Negative               | Negative                  |
| 113429      | Negative         | Negative               | Negative                  |
| 158660      | Mixed/Integrated | Mixed                  | Mixed                     |
| 258020      | Mixed/Integrated | Integrated             | Integrated                |
| 283920      | Negative         | Negative               | Negative                  |
| 343990      | Mixed/Integrated | Mixed                  | Mixed                     |
| 684152      | Negative         | Negative               | Negative                  |

**Table S19. Detection results of DIPS, E2/E6E7 ratio analysis and multiple E1-L1/E6E7 ratio analysis in the HPV 52-positive cases.**

| <b>Patient No.</b> | <b>DIPS</b>      | <b>E2/E6E7 ratio analysis</b> | <b>E1-L1/E6E7 ratio analysis</b> |
|--------------------|------------------|-------------------------------|----------------------------------|
| 174862             | Negative         | Negative                      | Negative                         |
| 237233             | Negative         | Negative                      | Negative                         |
| 105274             | Mixed/Integrated | Mixed                         | Mixed                            |
| 142149             | Negative         | Negative                      | Negative                         |
| 142474             | Negative         | Negative                      | Negative                         |
| 146280             | Mixed/Integrated | Negative                      | Negative                         |
| 156899             | Mixed/Integrated | Negative                      | Negative                         |
| 167239             | Mixed/Integrated | Integrated                    | Integrated                       |
| 224500             | Negative         | Negative                      | Negative                         |
| 236501             | Negative         | Negative                      | Negative                         |
| 331300             | Negative         | Negative                      | Negative                         |
| 455137             | Negative         | Negative                      | Negative                         |
| 466036             | Mixed/Integrated | Mixed                         | Integrated                       |

**Table S20. Detection results of DIPS, E2/E6E7 ratio analysis and multiple E1-L1/E6E7 ratio analysis in the HPV 53-positive cases.**

| <b>Patient No.</b> | <b>DIPS</b>      | <b>E2/E6E7 ratio analysis</b> | <b>E1-L1/E6E7 ratio analysis</b> |
|--------------------|------------------|-------------------------------|----------------------------------|
| 108544             | Negative         | Negative                      | Negative                         |
| 528778             | Negative         | Negative                      | Negative                         |
| 132080             | Negative         | Negative                      | Negative                         |
| 143224             | Negative         | Negative                      | Negative                         |
| 147282             | Mixed/Integrated | Negative                      | Negative                         |
| 152583             | Negative         | Negative                      | Negative                         |
| 160958             | Mixed/Integrated | Negative                      | Negative                         |
| 252533             | Negative         | Negative                      | Negative                         |
| 262455             | Negative         | Negative                      | Negative                         |
| 270406             | Mixed/Integrated | Integrated                    | Integrated                       |
| 273813             | Negative         | Negative                      | Negative                         |
| 281962             | Negative         | Negative                      | Negative                         |
| 285171             | Negative         | Negative                      | Negative                         |
| 288199             | Negative         | Negative                      | Negative                         |
| 289715             | Negative         | Negative                      | Negative                         |
| 296530             | Negative         | Negative                      | Negative                         |
| 307888             | Negative         | Negative                      | Negative                         |
| 356276             | Negative         | Negative                      | Negative                         |
| 409836             | Mixed/Integrated | Mixed                         | Mixed                            |
| 442858             | Negative         | Negative                      | Negative                         |
| 445398             | Negative         | Negative                      | Negative                         |
| 467319             | Negative         | Negative                      | Negative                         |
| 486398             | Mixed/Integrated | Integrated                    | Integrated                       |
| 497861             | Mixed/Integrated | Mixed                         | Integrated                       |
| 528801             | Negative         | Negative                      | Negative                         |

|        |          |          |          |
|--------|----------|----------|----------|
| 646062 | Negative | Negative | Negative |
|--------|----------|----------|----------|

**Table S21. Detection results of DIPS, E2/E6E7 ratio analysis and multiple E1-L1/E6E7 ratio analysis in the HPV 56-positive cases.**

| Patient No. | DIPS             | E2/E6E7 ratio analysis | E1-L1/E6E7 ratio analysis |
|-------------|------------------|------------------------|---------------------------|
| 472120      | Negative         | Negative               | Negative                  |
| 492121      | Negative         | Negative               | Negative                  |
| 171760      | Negative         | Negative               | Negative                  |
| 211503      | Mixed/Integrated | Mixed                  | Mixed                     |
| 289221      | Negative         | Negative               | Negative                  |
| 294827      | Negative         | Negative               | Negative                  |
| 304508      | Negative         | Negative               | Negative                  |
| 309537      | Mixed/Integrated | Integrated             | Integrated                |
| 319663      | Negative         | Negative               | Negative                  |
| 351797      | Mixed/Integrated | Mixed                  | Mixed                     |
| 361717      | Mixed/Integrated | Integrated             | Integrated                |
| 444280      | Negative         | Negative               | Negative                  |
| 447802      | Negative         | Negative               | Negative                  |
| 476196      | Mixed/Integrated | Mixed                  | Mixed                     |
| 564327      | Negative         | Negative               | Negative                  |
| 568528      | Negative         | Negative               | Negative                  |
| 576928      | Negative         | Negative               | Negative                  |
| 823340      | Negative         | Negative               | Negative                  |
| 846461      | Negative         | Negative               | Negative                  |
| 850723      | Negative         | Negative               | Negative                  |
| 960540      | Negative         | Negative               | Negative                  |

**Table S22. Detection results of DIPS, E2/E6E7 ratio analysis and multiple E1-L1/E6E7 ratio analysis in the HPV 58-positive cases.**

| Patient No. | DIPS             | E2/E6E7 ratio analysis | E1-L1/E6E7 ratio analysis |
|-------------|------------------|------------------------|---------------------------|
| 389880      | Negative         | Negative               | Negative                  |
| 282523      | Negative         | Negative               | Negative                  |
| 100241      | Negative         | Negative               | Negative                  |
| 142951      | Negative         | Negative               | Negative                  |
| 143313      | Negative         | Negative               | Negative                  |
| 269139      | Negative         | Negative               | Negative                  |
| 279976      | Negative         | Negative               | Negative                  |
| 312650      | Negative         | Negative               | Negative                  |
| 316063      | Negative         | Negative               | Negative                  |
| 319475      | Negative         | Negative               | Negative                  |
| 340970      | Negative         | Negative               | Negative                  |
| 399486      | Mixed/Integrated | Negative               | Mixed                     |
| 478612      | Negative         | Negative               | Negative                  |
| 493119      | Negative         | Negative               | Negative                  |
| 522897      | Mixed/Integrated | Integrated             | Integrated                |
| 645642      | Negative         | Negative               | Negative                  |

|        |                  |          |          |
|--------|------------------|----------|----------|
| 649737 | Negative         | Negative | Negative |
| 779644 | Mixed/Integrated | Mixed    | Mixed    |
| 988869 | Negative         | Negative | Negative |

**Table S23. Detection results of DIPS, E2/E6E7 ratio analysis and multiple E1-L1/E6E7 ratio analysis in the HPV 59-positive cases.**

| Patient No. | DIPS             | E2/E6E7 ratio analysis | E1-L1/E6E7 ratio analysis |
|-------------|------------------|------------------------|---------------------------|
| 161077      | Negative         | Negative               | Negative                  |
| 135658      | Negative         | Negative               | Negative                  |
| 101740      | Mixed/Integrated | Mixed                  | Mixed                     |
| 343726      | Negative         | Negative               | Negative                  |
| 349974      | Negative         | Negative               | Negative                  |
| 554048      | Negative         | Negative               | Negative                  |
| 904231      | Negative         | Negative               | Negative                  |

**Table S24. Detection results of DIPS, E2/E6E7 ratio analysis and multiple E1-L1/E6E7 ratio analysis in the HPV 61-positive cases.**

| Patient No. | DIPS             | E2/E6E7 ratio analysis | E1-L1/E6E7 ratio analysis |
|-------------|------------------|------------------------|---------------------------|
| 396143      | Negative         | Negative               | Negative                  |
| 141277      | Negative         | Negative               | Negative                  |
| 377376      | Mixed/Integrated | Mixed                  | Mixed                     |
| 510643      | Negative         | Negative               | Negative                  |
| 754323      | Negative         | Negative               | Negative                  |

**Table S25. Detection results of DIPS, E2/E6E7 ratio analysis and multiple E1-L1/E6E7 ratio analysis in the HPV 62-positive cases.**

| Patient No. | DIPS             | E2/E6E7 ratio analysis | E1-L1/E6E7 ratio analysis |
|-------------|------------------|------------------------|---------------------------|
| 522687      | Negative         | Negative               | Negative                  |
| 364480      | Negative         | Negative               | Negative                  |
| 345404      | Mixed/Integrated | Negative               | Integrated                |
| 432087      | Negative         | Negative               | Negative                  |
| 436221      | Negative         | Negative               | Negative                  |
| 624287      | Negative         | Mixed                  | Mixed                     |

**Table S26. Detection results of DIPS, E2/E6E7 ratio analysis and multiple E1-L1/E6E7 ratio analysis in the HPV 66-positive cases.**

| Patient No. | DIPS             | E2/E6E7 ratio analysis | E1-L1/E6E7 ratio analysis |
|-------------|------------------|------------------------|---------------------------|
| 445147      | Negative         | Negative               | Negative                  |
| 781823      | Negative         | Negative               | Negative                  |
| 214843      | Negative         | Negative               | Negative                  |
| 218320      | Negative         | Negative               | Negative                  |
| 265763      | Mixed/Integrated | Mixed                  | Mixed                     |
| 282271      | Mixed/Integrated | Integrated             | Integrated                |

|        |                  |          |          |
|--------|------------------|----------|----------|
| 332315 | Mixed/Integrated | Mixed    | Mixed    |
| 332610 | Negative         | Negative | Negative |
| 338511 | Mixed/Integrated | Mixed    | Mixed    |
| 347462 | Negative         | Negative | Negative |
| 349112 | Negative         | Negative | Negative |
| 359842 | Negative         | Negative | Negative |
| 368090 | Negative         | Negative | Negative |
| 416685 | Negative         | Negative | Negative |
| 792138 | Negative         | Negative | Negative |
| 808639 | Negative         | Negative | Negative |

**Table S27. Detection results of DIPS, E2/E6E7 ratio analysis and multiple E1-L1/E6E7 ratio analysis in the HPV 68-positive cases.**

| Patient No. | DIPS             | E2/E6E7 ratio analysis | E1-L1/E6E7 ratio analysis |
|-------------|------------------|------------------------|---------------------------|
| 345771      | Negative         | Negative               | Negative                  |
| 344005      | Negative         | Negative               | Negative                  |
| 149708      | Negative         | Negative               | Negative                  |
| 162073      | Negative         | Negative               | Negative                  |
| 166310      | Negative         | Negative               | Negative                  |
| 214310      | Mixed/Integrated | Negative               | Integrated                |
| 293474      | Negative         | Negative               | Negative                  |
| 294364      | Negative         | Negative               | Negative                  |
| 306731      | Mixed/Integrated | Integrated             | Integrated                |
| 329086      | Negative         | Negative               | Negative                  |
| 499939      | Negative         | Negative               | Negative                  |
| 562428      | Negative         | Negative               | Negative                  |
| 573266      | Mixed/Integrated | Mixed                  | Integrated                |
| 667985      | Mixed/Integrated | Mixed                  | Mixed                     |
| 805513      | Negative         | Negative               | Negative                  |
| 813214      | Negative         | Negative               | Negative                  |
| 839515      | Negative         | Negative               | Negative                  |
| 873927      | Negative         | Negative               | Negative                  |

**Table S28. Detection results of DIPS, E2/E6E7 ratio analysis and multiple E1-L1/E6E7 ratio analysis in the HPV 69-positive cases.**

| Patient No. | DIPS             | E2/E6E7 ratio analysis | E1-L1/E6E7 ratio analysis |
|-------------|------------------|------------------------|---------------------------|
| 172271      | Negative         | Negative               | Negative                  |
| 358077      | Negative         | Negative               | Negative                  |
| 111441      | Negative         | Negative               | Negative                  |
| 297880      | Mixed/Integrated | Mixed                  | Integrated                |
| 383298      | Negative         | Negative               | Negative                  |
| 416993      | Mixed/Integrated | Integrated             | Integrated                |
| 745366      | Negative         | Negative               | Negative                  |

**Table S29. Detection results of DIPS, E2/E6E7 ratio analysis and multiple E1-L1/E6E7 ratio analysis in the HPV 74-positive cases.**

| <b>Patient No.</b> | <b>DIPS</b> | <b>E2/E6E7 ratio analysis</b> | <b>E1-L1/E6E7 ratio analysis</b> |
|--------------------|-------------|-------------------------------|----------------------------------|
| 174040             | Negative    | Negative                      | Negative                         |

**Table S30. Detection results of DIPS, E2/E6E7 ratio analysis and multiple E1-L1/E6E7 ratio analysis in the HPV 93-positive cases.**

| <b>Patient No.</b> | <b>DIPS</b> | <b>E2/E6E7 ratio analysis</b> | <b>E1-L1/E6E7 ratio analysis</b> |
|--------------------|-------------|-------------------------------|----------------------------------|
| 582333             | Negative    | Negative                      | Negative                         |
